# Supplementary material for: Identification of three Daphne species by DNA barcoding and HPLC fingerprint analysis
Source: PubMed Central journal article supplement (PMC6072044; doi:10.1371/journal.pone.0201711), 2018-08-02

**S1 File. Photos of three *Daphne* species**

*Daphne giraldii* Nitsche (DG)

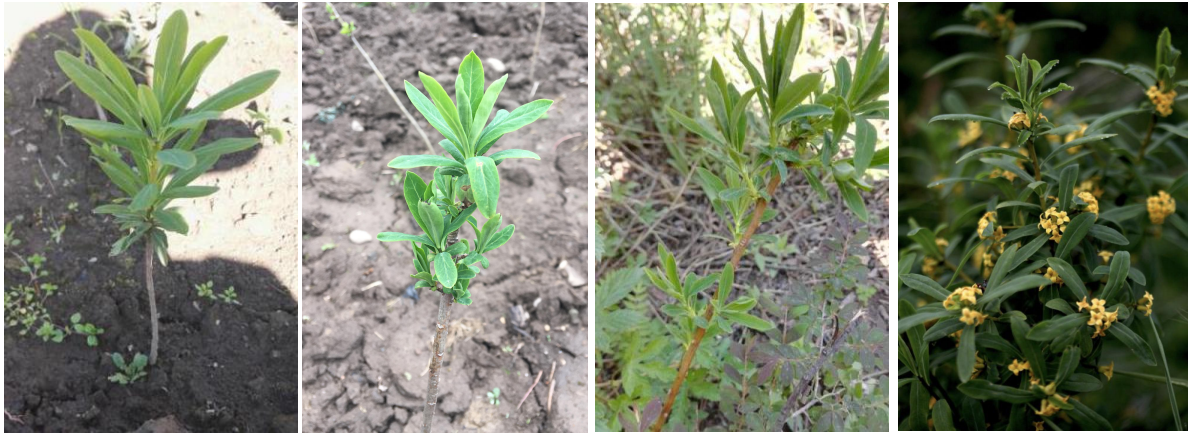

*Daphne tangutica* Maxim (DT)

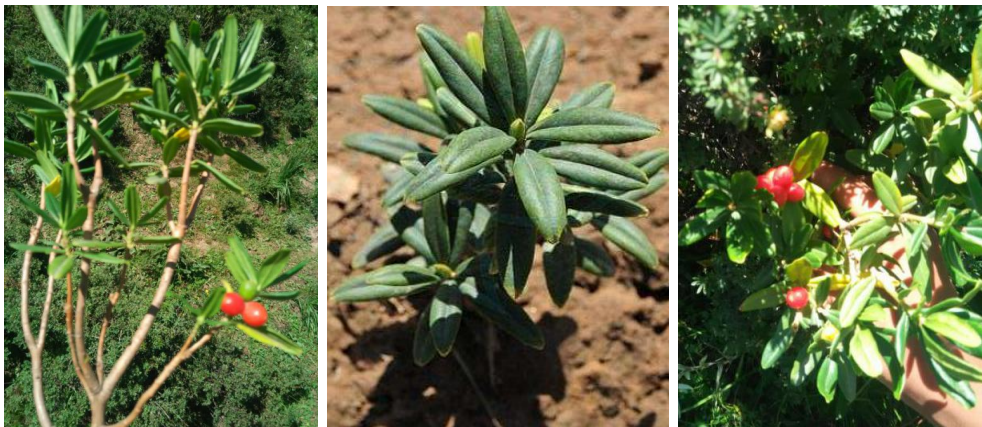

*Daphne retusa* Hemsl (DR)

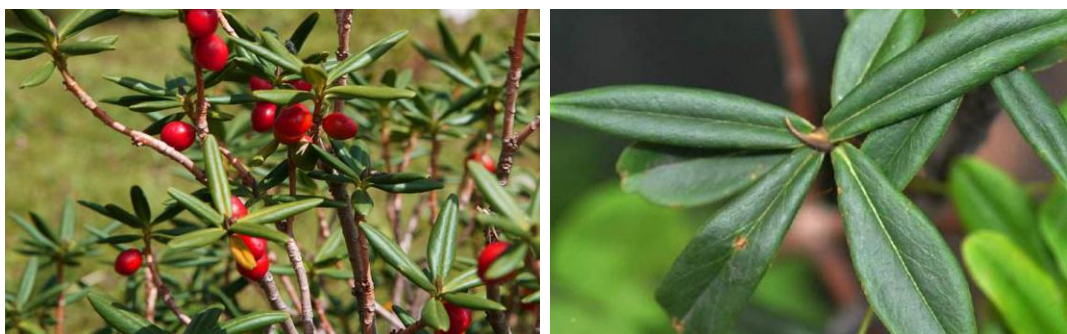

Supplement: pone.0201711.s001.pdf [file pone.0201711.s001.pdf]
