# Supplementary material for: Identification of three Daphne species by DNA barcoding and HPLC fingerprint analysis
Source: PubMed Central journal article supplement (PMC6072044; doi:10.1371/journal.pone.0201711), 2018-08-02
Supplement: pone.0201711.s002.pdf [file pone.0201711.s002.pdf]

## **S2 File. ITS sequences obtained from samples and GenBank**

*S1-DG:*

AATGCATAAAATATCTTCATCCAAAGGTTTGAAGTACAAGTGCAACCAACTCTAATGAC  
ATGCCATACACGATGACTTAACGAGGGCAAGCCAAGACAAACCACCGCTCATCATGAA  
ATACATGACATTAATGATTACCCTATTTAGCCAACCGCACTACTATGAGAACGGGAGA  
GCCATATAAGCCCTACACCAACAAATGTTGTAGAGGCTACAATGCGTGACACCCAAGC  
AGACGTGCCCTCAGCCCGAAGGCTTGGGGCGCAACTTGCGTTCAAAGACTCGATGGT  
TCACGGGATTCTGCAATTCACACCAAGTATCGCATTTTCGCTACGTTCTTCATCGATGCA  
AGAGCCGAGATATCCGTTGCCGAGAGTCATTCTTTATAATACATATCACGTATTACCGCA  
CACAATCTTATGCATGGGGAAAACGTTTCATTTATCACAATTCCTTGGCACAATCCGCG  
CCGGGGTTGGTTATCTTGGCCACATGGGCCAGTCGAGAGGAGATGGAGCCGATGACAC  
CAAAGCCCCCTCAACACATTTGCAAACATGTTACAGGTTGTTTTGCTTTGCAGGATT  
CGA

*S2-DG:*

AATGCATAAAATATCTTCATCCAAAGGTTTGAAGTACAAGTGCAACCAACTCTAATGAC  
ATGCCATACACGATGACTTAACGAGGGCAAGCCAAGACAAACCACCGCTCATCATGAA  
ATACATGACATTAATGATTACCCTATTTAGCCAACCGCACTACTATGAGAACGGGAGA  
GCCATATAAGCCCTACACCAACAAATGTTGTAGAGGCTACAATGCGTGACACCCAAGC  
AGACGTGCCCTCAGCCCGAAGGCTTGGGGCGCAACTTGCGTTCAAAGACTCGATGGT  
TCACGGGATTCTGCAATTCACACCAAGTATCGCATTTTCGCTACGTTCTTCATCGATGCA  
AGAGCCGAGATATCCGTTGCCGAGAGTCATTCTTTATAATACATATCACGTATTACCGCA  
CACAATCTTATGCATGGGGAAAACGTTTCATTTATCACAATTCCTTGGCACAATCCGCG  
CCGGGGTTGGTTATCTTGGCCACATGGGCCAGTCGAGAGGAGATGGAGCCGATGACAC  
CAAAGCCCCCTCAACACATTTGCAAACATGTTACAGGTTGTTTTGCTTTGCAGGATT  
CGA

*S3-DG:*

AATGCATAAAATATCTTCATCCAAAGGTTTGAAGTACAAGTGCAACCAACTCTAATGAC  
ATGCCATACACGATGACTTAACGAGGGCAAGCCAAGACAAACCACCGCTCATCATGAA  
ATACATGACATTAATGATTACCCTATTTAGCCAACCGCACTACTATGAGAACGGGAGA  
GCCATATAAGCCCTACACCAACAAATGTTGTAGAGGCTACAATGCGTGACACCCAAGC  
AGACGTGCCCTCAGCCCGAAGGCTTGGGGCGCAACTTGCGTTCAAAGACTCGATGGT  
TCACGGGATTCTGCAATTCACACCAAGTATCGCATTTTCGCTACGTTCTTCATCGATGCA  
AGAGCCGAGATATCCGTTGCCGAGAGTCATTCTTTATAATACATATCACGTATTACCGCA  
CACAATCTTATGCATGGGGAAAACGTTTCATTTATCACAATTCCTTGGCACAATCCGCG  
CCGGGGTTGGTTATCTTGGCCACATGGGCCAGTCGAGAGGAGATGGAGCCGATGACAC  
CAAAGCCCCCTCAACACATTTGCAAACATGTTACAGGTTGTTTTGCTTTGCAGGATT  
CGA

*S4-DG:*

AATGCATAAAATATCTTCATCCAAAGGTTTGAAGTACAAGTGCAACCAACTCTAATGAC  
ATGCCATACACGATGACTTAACGAGGGCAAGCCAAGACAAACCACCGCTCATCATGAA  
ATACATGACATTAATGATTACCCTATTTAGCCAACCGCACTACTATGAGAACGGGAGA  
GCCATATAAGCCCTACACCAACAAATGTTGTAGAGGCTACAATGCGTGACACCCAAGC  
AGACGTGCCCTCAGCCCGAAGGCTTGGGGCGCAACTTGCGTTCAAAGACTCGATGGT  
TCACGGGATTCTGCAATTCACACCAAGTATCGCATTTTCGCTACGTTCTTCATCGATGCA

AGAGCCGAGATATCCGTTGCCGAGAGTCATTCTTTATAATACATATCACGTATTACCGCA  
CACAATCTTATGCATGGGGAAAACGTTTCATTTATCACAATTCCTTGGCACAATCCGCG  
CCGGGGTTGGTTATCTTGGCCACATGGGCCAGTCGAGAGGAGATGGAGCCGATGACAC  
CAAAGCCCCCTCAACACATTTGCAAACATGTTACAGGTTGTTTTGCTTTGCAGGATT  
CGA

S5-DG:

AATGCATAAAATATCTTCATCCAAAGGTTTGAAGTACAAGTGCAACCAACTCTAATGAC  
ATGCCATACACGATGACTTAACGAGGGCAAGCCAAGACAAACCACCGCTCATCATGAA  
ATACATGACATTAATGATTACCCTATTTAGCCAACCGCACTACTATGAGAACGGGAGA  
GCCATATAAGCCCTACACCAACAAATGTTGTAGAGGCTACAATGCGTGACACCCAAGC  
AGACGTGCCCTCAGCCGAAGGCTTGGGGCGCAACTTGCGTTCAAAGACTCGATGGT  
TCACGGGATTCTGCAATTCACACCAAGTATCGCATTTGCTACGTTCTTCATCGATGCA  
AGAGCCGAGATATCCGTTGCCGAGAGTCATTCTTTATAATACATATCACGTATTACCGCA  
CACAATCTTATGCATGGGGAAAACGTTTCATTTATCACAATTCCTTGGCACAATCCGCG  
CCGGGGTTGGTTATCTTGGCCACATGGGCCAGTCGAGAGGAGATGGAGCCGATGACAC  
CAAAGCCCCCTCAACACATTTGCAAACATGTTACAGGTTGTTTTGCTTTGCAGGATT  
CGA

S6-DG:

AATGCATAAAATATCTTCATCCAAAGGTTTGAAGTACAAGTGCAACCAACTCTAATGAC  
ATGCCATACACGATGACTTAACGAGGGCAAGCCAAGACAAACCACCGCTCATCATGAA  
ATACATGACATTAATGATTACCCTATTTAGCCAACCGCACTACTATGAGAACGGGAGA  
GCCATATAAGCCCTACACAAACAAATGTTGTAGAGGCTACAATGCGTGACACCCAAGC  
AGACGTGCCCTCAGCCGAAGGCTTGGGGCGCAACTTGCGTTCAAAGACTCGATGGT  
TCACGGGATTCTGCAATTCACACCAAGTATCGCATTTGCTACGTTCTTCATCGATGCA  
AGAGCCGAGATATCCGTTGCCGAGAGTCATTCTTTATAATACATATCACGTATTACCGCA  
CACAATCTTATGCATGGGGAAAACGTTTCATTTATCACAATTCCTTGGCACAATCCGCG  
CCGGGGTTGGTTATCTTGGCCACATGGGCCAGTCGAGAGGAGATGGAGCCGATCACAC  
CAAAGCCCCCTCAACACATTTGCAAACATGTTACAGGTTGTTTTGCTTTGCAGGATT  
CGA

S7-DG:

AATGCATAAAATATCTTCATCCAAAGGTTTGAAGTACAAGTGCAACCAACTCTAATGAC  
ATGCCATACACGATGACTTAACGAGGGCAAGCCAAGACAAACCACCGCTCATCATGAA  
ATACATGACATTAATGATTACCCTATTTAGCCAACCGCACTACTATGAGAACGGGAGA  
GCCATATAAGCCCTACACAAACAAATGTTGTAGAGGCTACAATGCGTGACACCCAAGC  
AGACGTGCCCTCAGCCGAAGGCTTGGGGCGCAACTTGCGTTCAAAGACTCGATGGT  
TCACGGGATTCTGCAATTCACACCAAGTATCGCATTTGCTACGTTCTTCATCGATGCA  
AGAGCCGAGATATCCGTTGCCGAGAGTCATTCTTTATAATACATATCACGTATTACCGCA  
CACAATCTTATGCATGGGGAAAACGTTTCATTTATCACAATTCCTTGGCACAATCCGCG  
CCGGGGTTGGTTATCTTGGCCACATGGGCCAGTCGAGAGGAGATGGAGCCGATCACAC  
CAAAGCCCCCTCAACACATTTGCAAACATGTTACAGGTTGTTTTGCTTTGCAGGATT  
CGA

S8-DG:

AATGCATAAAATATCTTCATCCAAAGGTTTGAAGTACAAGTGCAACCAACTCTAATGAC  
ATGCCATACACGATGACTTAACGAGGGCAAGCCAAGACAAACCACCGCTCATCATGAA

ATACATGACATTAATGATTACCCTATTTAGCCAACCGCACTACTATGAGAACGGGAGA  
GCCATATAAGCCCTACACAAACAAATGTTGTAGAGGCTACAATGCGTGACACCCAAGC  
AGACGTGCCCTCAGCCCGAAGGCTTGGGGCGCAACTTGCGTTCAAAGACTCGATGGT  
TCACGGGATTCTGCAATTCACACCAAGTATCGCATTTTCGCTACGTTCTTCATCGATGCA  
AGAGCCGAGATATCCGTTGCCGAGAGTCATTCTTTATAATACATATCACGTATTACCGCA  
CACAATCTTATGCATGGGGAAAACGTTTCATTTATCACAATTCCTTGGCACAATCCGCG  
CCGGGGTTGGTTATCTTGGCCACATGGGCCAGTCGAGAGGAGATGGAGCCGATCACAC  
CAAAGCCCCCTCAACACATTTGCAAACATGTTACAGGTTGTTTTGCTTTGCAGGATT  
CGA

S9-DG:

AATGCATAAAATATCTTCATCCAAAGGTTTGAAGTACAAGTGCAACCAACTCTAATGAC  
ATGCCATACACGATGACTTAACGAGGGCAAGCCAAGACAAACCACCGCTCATCATGAA  
ATACATGACATTAATGATTACCCTATTTAGCCAACCGCACTACTATGAGAACGGGAGA  
GCCATATAAGCCCTACACAAACAAATGTTGTAGAGGCTACAATGCGTGACACCCAAGC  
AGACGTGCCCTCAGCCCGAAGGCTTGGGGCGCAACTTGCGTTCAAAGACTCGATGGT  
TCACGGGATTCTGCAATTCACACCAAGTATCGCATTTTCGCTACGTTCTTCATCGATGCA  
AGAGCCGAGATATCCGTTGCCGAGAGTCATTCTTTATAATACATATCACGTATTACCGCA  
CACAATCTTATGCATGGGGAAAACGTTTCATTTATCACAATTCCTTGGCACAATCCGCG  
CCGGGGTTGGTTATCTTGGCCACATGGGCCAGTCGAGAGGAGATGGAGCCGATCACAC  
CAAAGCCCCCTCAACACATTTGCAAACATGTTACAGGTTGTTTTGCTTTGCAGGATT  
CGA

S10-DG:

AATGCATAAAATATCTTCATCCAAAGGTTTGAAGTACAAGTGCAACCAACTCTAATGAC  
ATGCCATACACGATGACTTAACGAGGGCAAGCCAAGACAAACCACCGCTCATCATGAA  
ATACATGACATTAATGATTACCCTATTTAGCCAACCGCACTACTATGAGAACGGGAGA  
GCCATATAAGCCCTACACAAACAAATGTTGTAGAGGCTACAATGCGTGACACCCAAGC  
AGACGTGCCCTCAGCCCGAAGGCTTGGGGCGCAACTTGCGTTCAAAGACTCGATGGT  
TCACGGGATTCTGCAATTCACACCAAGTATCGCATTTTCGCTACGTTCTTCATCGATGCA  
AGAGCCGAGATATCCGTTGCCGAGAGTCATTCTTTATAATACATATCACGTATTACCGCA  
CACAATCTTATGCATGGGGAAAACGTTTCATTTATCACAATTCCTTGGCACAATCCGCG  
CCGGGGTTGGTTATCTTGGCCACATGGGCCAGTCGAGAGGAGATGGAGCCGATCACAC  
CAAAGCCCCCTCAACACATTTGCAAACATGTTACAGGTTGTTTTGCTTTGCAGGATT  
CGA

S11-DG:

AATGCATAAAATATCTTCATCCAAAGGTTTGAAGTACAAGTGCAACCAACTCTAATGAC  
ATGCCATACACGATGACTTAACGAGGGCAAGCCAAGACAAACCACCGCTCATCATGAA  
ATACATGACATTAATGATTACCCTATTTAGCCAACCGCACTACTATGAGAACGGGAGA  
GCCATATAAGCCCTACACAAACAAATGTTGTAGAGGCTACAATGCGTGACACCCAAGC  
AGACGTGCCCTCAGCCCGAAGGCTTGGGGCGCAACTTGCGTTCAAAGACTCGATGGT  
TCACGGGATTCTGCAATTCACACCAAGTATCGCATTTTCGCTACGTTCTTCATCGATGCA  
AGAGCCGAGATATCCGTTGCCGAGAGTCATTCTTTATAATACATATCACGTATTACCGCA  
CACAATCTTATGCATGGGGAAAACGTTTCATTTATCACAATTCCTTGGCACAATCCGCG  
CCGGGGTTGGTTATCTTGGCCACATGGGCCAGTCGAGAGGAGATGGAGCCGATCACAC  
CAAAGCCCCCTCAACACATTTGCAAACATGTTACAGGTTGTTTTGCTTTGCAGGATT

CGA

S12-DG:

AATGCATAAAATATCTTCATCCAAAGGTTTGAAGTACAAGTGCAACCAACTCTAATGAC  
ATGCCATACACGATGACTTAACGAGGGCAAGCCAAGACAAACCACCGCTCATCATGAA  
ATACATGACATTAATGATTACCCTATTTAGCCAACCGCACTACTATGAGAACGGGAGA  
GCCATATAAGCCCTACACAAACAAATGTTGTAGAGGCTACAATGCGTGACACCCAAGC  
AGACGTGCCCTCAGCCCGAAGGCTTGGGGCGCAACTTGCGTTCAAAGACTCGATGGT  
TCACGGGATTCTGCAATTCACACCAAGTATCGCATTTTCGCTACGTTCTTCATCGATGCA  
AGAGCCGAGATATCCGTTGCCGAGAGTCATTCTTTATAATACATATCACGTATTACCGCA  
CACAATCTTATGCATGGGGAAAACGTTTCATTTATCACAATTCCTTGGCACAATCCGCG  
CCGGGGTTGGTTATCTTGGCCACATGGGCCAGTCGAGAGGAGATGGAGCCGATCACAC  
CAAAGCCCCCTCAACACATTTGCAAACATGTTTACAGGTTGTTTTGCTTTGCAGGATT  
CGA

S13-DG:

AATGCATAAAATATCTTCATCCAAAGGTTTGAAGTACAAGTGCAACCAACTCTAATGAC  
ATGCCATACACGATGACTTAACGAGGGCAAGCCAAGACAAACCACCGCTCATCATGAA  
ATACATGACATTAATGATTACCCTATTTAGCCAACCGCACTACTATGAGAACGGGAGA  
GCCATATAAGCCCTACACAAACAAATGTTGTAGAGGCTACAATGCGTGACACCCAAGC  
AGACGTGCCCTCAGCCCGAAGGCTTGGGGCGCAACTTGCGTTCAAAGACTCGATGGT  
TCACGGGATTCTGCAATTCACACCAAGTATCGCATTTTCGCTACGTTCTTCATCGATGCA  
AGAGCCGAGATATCCGTTGCCGAGAGTCATTCTTTATAATACATATCACGTATTACCGCA  
CACAATCTTATGCATGGGGAAAACGTTTCATTTATCACAATTCCTTGGCACAATCCGCG  
CCGGGGTTGGTTATCTTGGCCACATGGGCCAGTCGAGAGGAGATGGAGCCGATCACAC  
CAAAGCCCCCTCAACACATTTGCAAACATGTTTACAGGTTGTTTTGCTTTGCAGGATT  
CGA

S14-DG:

AATGCGTACTATTATCTTCATCCAAAGGTTTGCAGTACAGATGCAACCAACTCTAATGA  
CATGCCACATGATGACTTAACGAGGGCAAGCCAAGGCAAACCACCGCTCATCATGAAA  
TACATGACATTAATGGTACTCTATTTCAACCAACCGCACTACTATGAGTACGGGAGAG  
CCATATCAGTCCTACACCAATTACTGTTGTAGAGCCTACAATGCGTGACACCCAGGCAG  
ACGTGCCCTCGACCAAAAAGGCTTGGGGCGCAACTTGCGTTCAAAGACTCGATGGTTC  
ACGGGATTCTGCAATTCACACCAAGTATCGCATTTTCGCTACGTTCTTCATCGATGCAAG  
AGCCGAGATATCCGTTGCCGAGAGTCATTATTTATAATACATATCACGTATTACCCACA  
CAATCTTATGTTAGATAGATGGGAAAACGTTTCATTTATCACAATTCCTTGGCACAATCC  
GCGCCGGGGTTGGTTATCTTGGCCACATGGGCCAGTCGAGAGGAGATGGAGCAAATGA  
CACCAAGCCCCCTCAACACATTTGTAAACATGTTTACAGGTTGTTCTGCTTTGCAGGAT  
TCGA

S15-DG:

AATGCGTACTATTATCTTCATCCAAAGGTTTGCAGTACAGATGCAACCAACTCTAATGA  
CATGCCACATGATGACTTAACGAGGGCAAGCCAAGGCAAACCACCGCTCATCATGAAA  
TACATGACATTAATGGTACTCTATTTCAACCAACCGCACTACTATGAGTACGGGAGAG  
CCATATCAGTCCTACACCAATTACTGTTGTAGAGCCTACAATGCGTGACACCCAGGCAG  
ACGTGCCCTCGACCAAAAAGGCTTGGGGCGCAACTTGCGTTCAAAGACTCGATGGTTC  
ACGGGATTCTGCAATTCACACCAAGTATCGCATTTTCGCTACGTTCTTCATCGATGCAAG

AGCCGAGATATCCGTTGCCGAGAGTCATTATTTATAATACATATCACGTATTACCCACA  
CAATCTTATGTTAGATAGATGGGAAAACGTTTCATTTATCACAATTCCTTGGCACAATCC  
GCGCCGGGGTTGGTTATCTTGGCCACATGGGCCAGTCGAGAGGAGATGGAGCAAATGA  
CACCAAGCCCCCTCAACACATTTGTAAACATGTTTCACAGGTTGTTCTGCTTTGCAGGAT  
TCGA

S16-DG:

AATGCGTACTATTATCTTCATCCAAAGGTTTGCAGTACAGATGCAACCAACTCTAATGA  
CATGCCACATGATGACTTAACGAGGGCAAGCCAAGGCAAACCACCGCTCATCATGAAA  
TACATGACATTAATGGTTACTCTATTTCAACCAACCGCACTACTATGAGTACGGGAGAG  
CCATATCAGTCCTACACCAATTACTGTTGTAGAGCCTACAATGCGTGACACCCAGGCAG  
ACGTGCCCTCGACCAAAAAGGCTTGGGGCGCAACTTGCGTTCAAAGACTCGATGGTTC  
ACGGGATTCTGCAATTCACACCAAGTATCGCATTTTCGCTACGTTCTTCATCGATGCAAG  
AGCCGAGATATCCGTTGCCGAGAGTCATTATTTATAATACATATCACGTATTACCCACA  
CAATCTTATGTTAGATAGATGGGAAAACGTTTCATTTATCACAATTCCTTGGCACAATCC  
GCGCCGGGGTTGGTTATCTTGGCCACATGGGCCAGTCGAGAGGAGATGGAGCAAATGA  
CACCAAGCCCCCTCAACACATTTGTAAACATGTTTCACAGGTTGTTCTGCTTTGCAGGAT  
TCGA

S17-DG:

AATGCGTACTATTATCTTCATCCAAAGGTTTGCAGTACAGATGCAACCAACTCTAATGA  
CATGCCACATGATGACTTAACGAGGGCAAGCCAAGGCAAACCACCGCTCATCATGAAA  
TACATGACATTAATGGTTACTCTATTTCAACCAACCGCACTACTATGAGTACGGGAGAG  
CCATATCAGTCCTACACCAATTACTGTTGTAGAGCCTACAATGCGTGACACCCAGGCAG  
ACGTGCCCTCGACCAAAAAGGCTTGGGGCGCAACTTGCGTTCAAAGACTCGATGGTTC  
ACGGGATTCTGCAATTCACACCAAGTATCGCATTTTCGCTACGTTCTTCATCGATGCAAG  
AGCCGAGATATCCGTTGCCGAGAGTCATTATTTATAATACATATCACGTATTACCCACA  
CAATCTTATGTTAGATAGATGGGAAAACGTTTCATTTATCACAATTCCTTGGCACAATCC  
GCGCCGGGGTTGGTTATCTTGGCCACATGGGCCAGTCGAGAGGAGATGGAGCAAATGA  
CACCAAGCCCCCTCAACACATTTGTAAACATGTTTCACAGGTTGTTCTGCTTTGCAGGAT  
TCGA

S18-DT:

AATGCGTACTATTATCTTCATCCAAAGGTTTGCAGTACAGATGCAACCAACTCTAATGA  
CATGCCACATGATGACTTAACGAGGGCAAGCCAAGGCAAACCACCGCTCATCATGAAA  
TACATGACATTAATGGTTACTCTATTTCAACCAACCGCACTACTATGAGTACGGGAGAG  
CCATATCAGTCCTACACCAATTACTGTTGTAGAGCCTACAATGCGTGACACCCAGGCAG  
ACGTGCCCTCGACCAAAAAGGCTTGGGGCGCAACTTGCGTTCAAAGACTCGATGGTTC  
ACGGGATTCTGCAATTCACACCAAGTATCGCATTTTCGCTACGTTCTTCATCGATGCAAG  
AGCCGAGATATCCGTTGCCGAGAGTCATTCTTTATAATACATATCACGTATTACCCACA  
CAATCTTATGTTAGATAGATGGGAAAACGTTTCATTTATCACAATTCCTTGGCACAATCC  
GCGCCGGGGTTGGTTATCTTGGCCACATGGGCCAGTCGAGAGGAGATGAAGCAAATGA  
CACCAAGCCCCCTCAACACATTTGTAAACATGTTTCACAGGTTGTTCTGCTTTGCAGGAT  
TCGA

S19-DT:

AATGCGTACTATTATCTTCATCCAAAGGTTTGCAGTACAGATGCAACCAACTCTAATGA  
CATGCCACATGATGACTTAACGAGGGCAAGCCAAGGCAAACCACCGCTCATCATGAAA

TACATGACATTAATGGTACTCTATTTCAACCAACCGCACTACTATGAGTACGGGAGAG  
CCATATCAGTCCTACACCAATTACTGTTGTAGAGCCTACAATGCGTGACACCCAGGCAG  
ACGTGCCCTCGACCAAAAAGGCTTGGGGCGCAACTTGCGTTCAAAGACTCGATGGTTC  
ACGGGATTCTGCAATTCACACCAAGTATCGCATTTTCGCTACGTTCTTCATCGATGCAAG  
AGCCGAGATATCCGTTGCCGAGAGTCATTCTTTATAATACATATCACGTATTACCCACA  
CAATCTTATGTTAGATAGATGGGAAAACGTTTCATTTATCACAATTCCTTGGCACAATCC  
GCGCCGGGGTGGTTATCTTGGCCACATGGGCCAGTCGAGAGGAGATGAAGCAAATGA  
CACCAAGCCCCCTCAACACATTTGTAAACATGTTTCACAGGTTGTTCTGCTTTGCAGGAT  
TCGA

S20-DT:

AATGCGTACTATTATCTTCATCCAAAGGTTTGCAGTACAGATGCAACCAACTCTAATGA  
CATGCCACATGATGACTTAACGAGGGCAAGCCAAGGCAAACCACCGCTCATCATGAAA  
TACATGACATTAATGGTACTCTATTTCAACCAACCGCACTACTATGAGTACGGGAGAG  
CCATATCAGTCCTACACCAATTACTGTTGTAGAGCCTACAATGCGTGACACCCAGGCAG  
ACGTGCCCTCGACCAAAAAGGCTTGGGGCGCAACTTGCGTTCAAAGACTCGATGGTTC  
ACGGGATTCTGCAATTCACACCAAGTATCGCATTTTCGCTACGTTCTTCATCGATGCAAG  
AGCCGAGATATCCGTTGCCGAGAGTCATTCTTTATAATACATATCACGTATTACCCACA  
CAATCTTATGTTAGATAGATGGGAAAACGTTTCATTTATCACAATTCCTTGGCACAATCC  
GCGCCGGGGTGGTTATCTTGGCCACATGGGCCAGTCGAGAGGAGATGAAGCAAATGA  
CACCAAGCCCCCTCAACACATTTGTAAACATGTTTCACAGGTTGTTCTGCTTTGCAGGAT  
TCGA

S21-DT:

AATGCGTACTATTATCTTCATCCAAAGGTTTGCAGTACAGATGCAACCAACTCTAATGA  
CATGCCACATGATGACTTAACGAGGGCAAGCCAAGGCAAACCACCGCTCATCATGAAA  
TACATGACATTAATGGTACTCTATTTCAACCAACCGCACTACTATGAGTACGGGAGAG  
CCATATCAGTCCTACACCAATTACTGTTGTAGAGCCTACAATGCGTGACACCCAGGCAG  
ACGTGCCCTCGACCAAAAAGGCTTGGGGCGCAACTTGCGTTCAAAGACTCGATGGTTC  
ACGGGATTCTGCAATTCACACCAAGTATCGCATTTTCGCTACGTTCTTCATCGATGCAAG  
AGCCGAGATATCCGTTGCCGAGAGTCATTCTTTATAATACATATCACGTATTACCCACA  
CAATCTTATGTTAGATAGATGGGAAAACGTTTCATTTATCACAATTCCTTGGCACAATCC  
GCGCCGGGGTGGTTATCTTGGCCACATGGGCCAGTCGAGAGGAGATGAAGCAAATGA  
CACCAAGCCCCCTCAACACATTTGTAAACATGTTTCACAGGTTGTTCTGCTTTGCAGGAT  
TCGA

S22-DT:

AATGCGTACTATTATCTTCATCCAAAGGTTTGCAGTACAGATGCAACCAACTCTAATGA  
CATGCCACATGATGACTTAACGAGGGCAAGCCAAGGCAAACCACCGCTCATCATGAAA  
TACATGACATTAATGGTACTCTATTTCAACCAACCGCACTACTATGAGTACGGGAGAG  
CCATATCAGTCCTACACCAATTACTGTTGTAGAGCCTACAATGCGTGACACCCAGGCAG  
ACGTGCCCTCGACCAAAAAGGCTTGGGGCGCAACTTGCGTTCAAAGACTCGATGGTTC  
ACGGGATTCTGCAATTCACACCAAGTATCGCATTTTCGCTACGTTCTTCATCGATGCAAG  
AGCCGAGATATCCGTTGCCGAGAGTCATTCTTTATAATACATATCACGTATTACCCACA  
CAATCTTATGTTAGATAGATGGGAAAACGTTTCATTTATCACAATTCCTTGGCACAATCC  
GCGCCGGGGTGGTTATCTTGGCCACATGGGCCAGTCGAGAGGAGATGAAGCAAATGA  
CACCAAGCCCCCTCAACACATTTGTAAACATGTTTCACAGGTTGTTCTGCTTTGCAGGAT

TCGA

S23-DT:

AATGCGTACTATTATCTTCATCCAAAGGTTTGCAGTACAGATGCAACCAACTCTAATGA  
CATGCCACATGATGACTTAACGAGGGCAAGCCAAGGCAAACCACCGCTCATCATGAAA  
TACATGACATTAATGGTACTCTATTTCAACCAACCGCACTACTATGAGTACGGGAGAG  
CCATATCAGTCCTACACCAATTACTGTTGTAGAGCCTACAATGCGTGACACCCAGGCAG  
ACGTGCCCTCGACCAAAAAGGCTTGGGGCGCAACTTGC GTTCAAAGACTCGATGGTTC  
ACGGGATTCTGCAATTCACACCAAGTATCGCATTTCGCTACGTTCTTCATCGATGCAAG  
AGCCGAGATATCCGTTGCCGAGAGTCATTCTTTATAATACATATCACGTATTACCCACA  
CAATCTTATGTTAGATAGATGGGAAAACGTTTCATTTATCACAATTCCTTGGCACAATCC  
GCGCCGGGGTTGGTTATCTTGGCCACATGGGCCAGTCGAGAGGAGATGAAGCAAATGA  
CACCAAGCCCCCTCAACACATTTGTAAACATGTTTACAGGTTGTTCTGCTTTGCAGGAT  
TCGA

S24-DT:

AATGCGTACTATTATCTTCATCCAAAGGTTTGCAGTACAGATGCAACCAACTCTAATGA  
CATGCCACATGATGACTTAACGAGGGCAAGCCAAGGCAAACCACCGCTCATCATGAAA  
TACATGACATTAATGGTACTCTATTTCAACCAACCGCACTACTATGAGTACGGGAGAG  
CCATATCAGTCCTACACCAATTACTGTTGTAGAGCCTACAATGCGTGACACCCAGGCAG  
ACGTGCCCTCGACCAAAAAGGCTTGGGGCGCAACTTGC GTTCAAAGACTCGATGGTTC  
ACGGGATTCTGCAATTCACACCAAGTATCGCATTTCGCTACGTTCTTCATCGATGCAAG  
AGCCGAGATATCCGTTGCCGAGAGTCATTCTTTATAATACATATCACGTATTACCCACA  
CAATCTTATGTTAGATAGATGGGAAAACGTTTCATTTATCACAATTCCTTGGCACAATCC  
GCGCCGGGGTTGGTTATCTTGGCCACATGGGCCAGTCGAGAGGAGATGAAGCAAATGA  
CACCAAGCCCCCTCAACACATTTGTAAACATGTTTACAGGTTGTTCTGCTTTGCAGGAT  
TCGA

S25-DT:

AATGCGTACTATTATCTTCATCCAAAGGTTTGCAGTACAGATGCAACCAACTCCAATGA  
CATGCCACATGATGACTTAACGAGGGCAAGCCAAGGCAAACCACCGCTCATCATGAAA  
TACATGACATTAATGGTACTCTATTTCAACCAACCGCACTACTATGAGTACGGGAGAG  
CCATATCAGTCCTACACCAATTACTGTTGTAGAGCCTACAATGCGTGACACCCAGGCAG  
ACGTGCCCTCGACCAAAAAGGCTTGGGGCGCAACTTGC GTTCAAAGACTCGATGGTTC  
ACGGGATTCTGCAATTCACACCAAGTATCGCATTTCGCTACGTTCTTCATCGATGCAAG  
AGCCGAGATATCCGTTGCCGAGAGTCATTCTTTATAATACATATCACGTATTACCCACA  
CAATCTTATGTTAGATAGATGGGAAAACGTTTCATTTATCACAATTCCTTGGCACAATCC  
GTGCCGGGGTTGGTTATCTTGGCCACATGGGCCAGTCGAGAGGAGATGGAGCAAATGA  
CACCAAGCCCCCTCAACACATTTGTAAACATGTTTACAGGTTGTTCTGCTTTGCAGGAT  
TCGA

S26-DT:

AATGCGTACTATTATCTTCATCCAAAGGTTTGCAGTACAGATGCAACCAACTCTAATGA  
CATGCCACATGATGACTTAACGAGGGCAAGCCAAGGCAAACCACCGCTCATCATGAAA  
TACATGACATTAATGGTACTCTATTTCAACCAACCGCACTACTATGAGTACGGGAGAG  
CCATATCAGTCCTACACCAATTACTGTTGTAGAGCCTACAATGCGTGACACCCAGGCAG  
ACGTGCCCTCGACCAAAAAGGCTTGGGGCGCAACTTGC GTTCAAAGACTCGATGGTTC  
ACGGGATTCTGCAATTCACACCAAGTATCGCATTTCGCTACGTTCTTCATCGATGCAAG

AGCCGAGATATCCGTTGCCGAGAGTCATTCTTTATAATACATATCACGTATTACCCCACA  
CAATCTTATGTTAGATAGATGGGAAAACGTTTCATTTATCACAATTCCTTGGCACAATCC  
GTGCCGGGGTTGGTTATCTTGGCCACATGGGCCAGTCGAGAGGAGATGGAGCAAATGA  
CACCAAGCCCCCTCAACACATTTGTAAACATGTTTACAGGTTGTTCTGCTTTGCAGGAT  
TCGA

S27-DT:

AATGCGTACTATTATCTTCATCCAAAGGTTTGCAGTACAGATGCAACCAACTCCAATGA  
CATGCCACATGATGACTTAACGAGGGCAAGCCAAGGCAAACCACCGCTCATCATGAAA  
TACATGACATTAATGGTTACTCTATTTCAACCAACCGCACTACTATGAGTACGGGAGAG  
CCATATCAGTCCTACACCAATTACTGTTGTAGAGCCTACAATGCGTGACACCCAGGCAG  
ACGTGCCCTCGACCAAAGGCTTGGGGCGCAACTTGCGTTCAAAGACTCGATGGTTC  
ACGGGATTCTGCAATTCACACCAAGTATCGCATTTTCGCTACGTTCTTCATCGATGCAAG  
AGCCGAGATATCCGTTGCCGAGAGTCATTCTTTATAATACATATCACGTATTACCCCACA  
CAATCTTATGTTAGATAGATGGGAAAACGTTTCATTTATCACAATTCCTTGGCACAATCC  
GTGCCGGGGTTGGTTATCTTGGCCACATGGGCCAGTCGAGAGGAGATGGAGCAAATGA  
CACCAAGCCCCCTCAACACATTTGTAAACATGTTTACAGGTTGTTCTGCTTTGCAGGAT  
TCGA

S28-DT:

AATGCGTACTATTATCTTCATCCAAAGGTTTGCAGTACAGATGCAACCAACTCTAATGA  
CATGCCACATGATGACTTAACGAGGGCAAGCCAAGGCAAACCACCGCTCATCATGAAA  
TACATGACATTAATGGTTACTCTATTTCAACCAACCGCACTACTATGAGTACGGGAGAG  
CCATATCAGTCCTACACCAATTACTGTTGTAGAGCCTACAATGCGTGACACCCAGGCAG  
ACGTGCCCTCGACCAAAGGCTTGGGGCGCAACTTGCGTTCAAAGACTCGATGGTTC  
ACGGGATTCTGCAATTCACACCAAGTATCGCATTTTCGCTACGTTCTTCATCGATGCAAG  
AGCCGAGATATCCGTTGCCGAGAGTCATTCTTTATAATACATATCACGTATTACCCCACA  
CAATCTTATGTTAGATAGATGGGAAAACGTTTCATTTATCACAATTCCTTGGCACAATCC  
GTGCCGGGGTTGGTTATCTTGGCCACATGGGCCAGTCGAGAGGAGATGGAGCAAATGA  
CACCAAGCCCCCTCAACACATTTGTAAACATGTTTACAGGTTGTTCTGCTTTGCAGGAT  
TCGA

S29-DT:

AATGCGTACTATTATCTTCATCCAAAGGTTTGCAGTACAGATGCAACCAACTCTAATGA  
CATGCCACATGATGACTTAACGAGGGCAAGCCAAGGCAAACCACCGCTCATCATGAAA  
TACATGACATTAATGGTTACTCTATTTCAACCAACCGCACTACTATGAGTACGGGAGAG  
CCATATCAGTCCTACACCAATTACTGTTGTAGAGCCTACAATGCGTGACACCCAGGCAG  
ACGTGCCCTCGACCAAAGGCTTGGGGCGCAACTTGCGTTCAAAGACTCGATGGTTC  
ACGGGATTCTGCAATTCACACCAAGTATCGCATTTTCGCTACGTTCTTCATCGATGCAAG  
AGCCGAGATATCCGTTGCCGAGAGTCATTCTTTATAATACATATCACGTATTACCCCACA  
CAATCTTATGTTAGATAGATGGGAAAACGTTTCATTTATCACAATTCCTTGGCACAATCC  
GTGCCGGGGTTGGTTATCTTGGCCACATGGGCCAGTCGAGAGGAGATGGAGCAAATGA  
CACCAAGCCCCCTCAACACATTTGTAAACATGTTTACAGGTTGTTCTGCTTTGCAGGAT  
TCGA

S30-DT:

AATGCGTACTATTATCTTCATCCAAAGGTTTGCAGTACAGATGCAACCAACTCCAATGA  
CATGCCACATGATGACTTAACGAGGGCAAGCCAAGGCAAACCACCGCTCATCATGAAA



TACATGACATTAATGGTACTCTATTTCAACCAACCGCACTACTATGAGTACGGGAGAG  
CCATATCAGTCCTACACCAATTACTGTTGTAGAGCCTACAATGCGTGACACCCAGGCAG  
ACGTGCCCTCGACCAAAAAGGCTTGGGGCGCAACTTGCGTTCAAAGACTCGATGGTTC  
ACGGGATTCTGCAATTCACACCAAGTATCGCATTTTCGCTACGTTCTTCATCGATGCAAG  
AGCCGAGATATCCGTTGCCGAGAGTCATTCTTTATAATACATATCACGTATTACCCACA  
CAATCTTATGTTAGATAGATGGGAAAACGTTTCATTTATCACAATTCCTTGGCACAATCC  
GTGCCGGGGTGGTTATCTTGGCCACATGGGCCAGTCGAGAGGAGATGGAGCAAATGA  
CACCAAGCCCCCTCAACACATTTGTAAACATGTTTCACAGGTTGTTCTGCTTTGCAGGAT  
TCGA

S31-DT:

AATGCGTACTATTATCTTCATCCAAAGGTTTGCAGTACAGATGCAACCAACTCTAATGA  
CATGCCACATGATGACTTAACGAGGGCAAGCCAAGGCAAACCACCGCTCATCATGAAA  
TACATGACATTAATGGTACTCTATTTCAACCAACCGCACTACTATGAGTACGGGAGAG  
CCATATCAGTCCTACACCAATTACTGTTGTAGAGCCTACAATGCGTGACACCCAGGCAG  
ACGTGCCCTCGACCAAAAAGGCTTGGGGCGCAACTTGCGTTCAAAGACTCGATGGTTC  
ACGGGATTCTGCAATTCACACCAAGTATCGCATTTTCGCTACGTTCTTCATCGATGCAAG  
AGCCGAGATATCCGTTGCCGAGAGTCATTCTTTATAATACATATCACGTATTACCCACA  
CAATCTTATGTTAGATAGATGGGAAAACGTTTCATTTATCACAATTCCTTGGCACAATCC  
GTGCCGGGGTGGTTATCTTGGCCACATGGGCCAGTCGAGAGGAGATGGAGCAAATGA  
CACCAAGCCCCCTCAACACATTTGTAAACATGTTTCACAGGTTGTTCTGCTTTGCAGGAT  
TCGA

S32-DT:

AATGCGTACTATTATCTTCATCCAAAGGTTTGCAGTACAGATGCAACCAACTCTAATGA  
CATGCCACATGATGACTTAACGAGGGCAAGCCAAGGCAAACCACCGCTCATCATGAAA  
TACATGACATTAATGGTACTCTATTTCAACCAACCGCACTACTATGAGTACGGGAGAG  
CCATATCAGTCCTACACCAATTACTGTTGTAGAGCCTACAATGCGTGACACCCAGGCAG  
ACGTGCCCTCGACCAAAAAGGCTTGGGGCGCAACTTGCGTTCAAAGACTCGATGGTTC  
ACGGGATTCTGCAATTCACACCAAGTATCGCATTTTCGCTACGTTCTTCATCGATGCAAG  
AGCCGAGATATCCGTTGCCGAGAGTCATTCTTTATAATACATATCACGTATTACCCACA  
CAATCTTATGTTAGATAGATGGGAAAACGTTTCATTTATCACAATTCCTTGGCACAATCC  
GTGCCGGGGTGGTTATCTTGGCCACATGGGCCAGTCGAGAGGAGATGGAGCAAATGA  
CACCAAGCCCCCTCAACACATTTGTAAACATGTTTCACAGGTTGTTCTGCTTTGCAGGAT  
TCGA

S33-DT:

AATGCGTACTATTATCTTCATCCAAAGGTTTGCAGTACAGATGCAACCAACTCTAATGA  
CATGCCACATGATGACTTAACGAGGGCAAGCCAAGGCAAACCACCGCTCATCATGAAA  
TACATGACATTAATGGTACTCTATTTCAACCAACCGCACTACTATGAGTACGGGAGAG  
CCATATCAGTCCTACACCAATTACTGTTGTAGAGCCTACAATGCGTGACACCCAGGCAG  
ACGTGCCCTCGACCAAAAAGGCTTGGGGCGCAACTTGCGTTCAAAGACTCGATGGTTC  
ACGGGATTCTGCAATTCACACCAAGTATCGCATTTTCGCTACGTTCTTCATCGATGCAAG  
AGCCGAGATATCCGTTGCCGAGAGTCATTCTTTATAATACATATCACGTATTACCCACA  
CAATCTTATGTTAGATAGATGGGAAAACGTTTCATTTATCACAATTCCTTGGCACAATCC  
GTGCCGGGGTGGTTATCTTGGCCACATGGGCCAGTCGAGAGGAGATGGAGCAAATGA  
CACCAAGCCCCCTCAACACATTTGTAAACATGTTTCACAGGTTGTTCTGCTTTGCAGGAT

TCGA

S34-DT:

AATGCGTACTATTATCTTCATCCAAAGGTTTGCAGTACAGATGCAACCAACTCTAATGA  
CATGCCACATGATGACTTAACGAGGGCAAGCCAAGGCAAACCACCGCTCATCATGAAA  
TACATGACATTAATGGTACTCTATTTCAACCAACCGCACTACTATGAGTACGGGAGAG  
CCATATCAGTCCTACACCAATTACTGTTGTAGAGCCTACAATGCGTGACACCCAGGCAG  
ACGTGCCCTCGACCAAAAAGGCTTGGGGCGCAACTTGC GTTCAAAGACTCGATGGTTC  
ACGGGATTCTGCAATTCACACCAAGTATCGCATTTCGCTACGTTCTTCATCGATGCAAG  
AGCCGAGATATCCGTTGCCGAGAGTCATTCTTTATAATACATATCACGTATTACCCACA  
CAATCTTATGTTAGATAGATGGGAAAACGTTTCATTATCACAATTCCTTGGCACAATCC  
GTGCCGGGGTGGTTATCTTGGCCACATGGGCCAGTCGAGAGGAGATGGAGCAAATGA  
CACCAAGCCCCCTCAACACATTTGTAAACATGTTTACAGGTTGTTCTGCTTTGCAGGAT  
TCGA

S35-DT:

AATGCGTACTATTATCTTCATCCAAAGGTTTGCAGTACAGATGCAACCAACTCTAATGA  
CATGCCACATGATGACTTAACGAGGGCAAGCCAAGGCAAACCACCGCTCATCATGAAA  
TACATGACATTAATGGTACTCTATTTCAACCAACCGCACTACTATGAGTACGGGAGAG  
CCATATCAGTCCTACACCAATTACTGTTGTAGAGCCTACAATGCGTGACACCCAGGCAG  
ACGTGCCCTCGACCAAAAAGGCTTGGGGCGCAACTTGC GTTCAAAGACTCGATGGTTC  
ACGGGATTCTGCAATTCACACCAAGTATCGCATTTCGCTACGTTCTTCATCGATGCAAG  
AGCCGAGATATCCGTTGCCGAGAGTCATTCTTTATAATACATATCACGTATTACCCACA  
CAATCTTATGTTAGATAGATGGGAAAACGTTTCATTATCACAATTCCTTGGCACAATCC  
GTGCCGGGGTGGTTATCTTGGCCACATGGGCCAGTCGAGAGGAGATGGAGCAAATGA  
CACCAAGCCCCCTCAACACATTTGTAAACATGTTTACAGGTTGTTCTGCTTTGCAGGAT  
TCGA

S36-DT:

AATGCGTACTATTATCTTCATCCAAAGGTTTGCAGTACAGATGCAACCAACTCTAATGA  
CATGCCACATGATGACTTAACGAGGGCAAGCCAAGGCAAACCACCGCTCATCATGAAA  
TACATGACATTAATGGTACTCTATTTCAACCAACCGCACTACTATGAGTACGGGAGAG  
CCATATCAGTCCTACACCAATTACTGTTGTAGAGCCTACAATGCGTGACACCCAGGCAG  
ACGTGCCCTCGACCAAAAAGGCTTGGGGCGCAACTTGC GTTCAAAGACTCGATGGTTC  
ACGGGATTCTGCAATTCACACCAAGTATCGCATTTCGCTACGTTCTTCATCGATGCAAG  
AGCCGAGATATCCGTTGCCGAGAGTCATTCTTTATAATACATATCACGTATTACCCACA  
CAATCTTATGTTAGATAGATGGGAAAACGTTTCATTATCACAATTCCTTGGCACAATCC  
GTGCCGGGGTGGTTATCTTGGCCACATGGGCCAGTCGAGAGGAGATGGAGCAAATGA  
CACCAAGCCCCCTCAACACATTTGTAAACATGTTTACAGGTTGTTCTGCTTTGCAGGAT  
TCGA

S37-DT:

AATGCGTACTATTATCTTCATCCAAAGGTTTGCAGTACAGATGCAACCAACTCTAATGA  
CATGCCACATGATGACTTAACGAGGGCAAGCCAAGGCAAACCACCGCTCATCATGAAA  
TACATGACATTAATGGTACTCTATTTCAACCAACCGCACTACTATGAGTACGGGAGAG  
CCATATCAGTCCTACACCAATTACTGTTGTAGAGCCTACAATGCGTGACACCCAGGCAG  
ACGTGCCCTCGACCAAAAAGGCTTGGGGCGCAACTTGC GTTCAAAGACTCGATGGTTC  
ACGGGATTCTGCAATTCACACCAAGTATCGCATTTCGCTACGTTCTTCATCGATGCAAG

AGCCGAGATATCCGTTGCCGAGAGTCATTCTTTATAATACATATCACGTATTACCCCACA  
CAATCTTATGTTAGATAGATGGGAAAACGTTTCATTTATCACAATTCCTTGGCACAATCC  
GTGCCGGGGTTGGTTATCTTGGCCACATGGGCCAGTCGAGAGGAGATGGAGCAAATGA  
CACCAAGCCCCCTCAACACATTTGTAAACATGTTTCACAGGTTGTTCTGCTTTGCAGGAT  
TCGA

S38-DT:

AATGCGTACTATTATCTTCATCCAAAGGTTTGCAGTACAGATGCAACCAACTCTAATGA  
CATGCCACATGATGACTTAACGAGGGCAAGCCAAGGCAAACCACCGCTCATCATGAAA  
TACATGACATTAATGGTTACTCTATTTCAACCAACCGCACTACTATGAGTACGGGAGAG  
CCATATCAGTCCTACACCAATTACTGTTGTAGAGCCTACAATGCGTGACACCCAGGCAG  
ACGTGCCCTCGACCAAAAAGGCTTGGGGCGCAACTTGCGTTCAAAGACTCGATGGTTC  
ACGGGATTCTGCAATTCACACCAAGTATCGCATTTTCGCTACGTTCTTCATCGATGCAAG  
AGCCGAGATATCCGTTGCCGAGAGTCATTCTTTATAATACATATCACGTATTACCCCACA  
CAATCTTATGTTAGATAGATGGGAAAACGTTTCATTTATCACAATTCCTTGGCACAATCC  
GTGCCGGGGTTGGTTATCTTGGCCACATGGGCCAGTCGAGAGGAGATGGAGCAAATGA  
CACCAAGCCCCCTCAACACATTTGTAAACATGTTTCACAGGTTGTTCTGCTTTGCAGGAT  
TCGA

S39-DT:

AATGCGTACTATTATCTTCATCCAAAGGTTTGCAGTACAGATGCAACCAACTCTAATGA  
CATGCCACATGATGACTTAACGAGGGCAAGCCAAGGCAAACCACCGCTCATCATGAAA  
TACATGACATTAATGGTTACTCTATTTCAACCAACCGCACTACTATGAGTACGGGAGAG  
CCATATCAGTCCTACACCAATTACTGTTGTAGAGCCTACAATGCGTGACACCCAGGCAG  
ACGTGCCCTCGACCAAAAAGGCTTGGGGCGCAACTTGCGTTCAAAGACTCGATGGTTC  
ACGGGATTCTGCAATTCACACCAAGTATCGCATTTTCGCTACGTTCTTCATCGATGCAAG  
AGCCGAGATATCCGTTGCCGAGAGTCATTCTTTATAATACATATCACGCATTACCCCACA  
CAATCTTATGTTAGATAGATGGGAAAACGTTTCATTTATCACAATTCCTTGGCACAATCC  
GTGCCGGGGTTGGTTATCTTGGCCACATGGGCCAGTCGAGAGGAGATGGAGCAAATGA  
CACCAAGCCCCCTCAACACATTTGTAAACATGTTTCACAGGTTGTTCTGCTTTGCAGGAT  
TCGA

S40-DT:

AATGCGTACTATTATCTTCATCCAAAGGTTTGCAGTACAGATGCAACCAACTCTAATGA  
CATGCCACATGATGACTTAACGAGGGCAAGCCAAGGCAAACCACCGCTCATCATGAAA  
TACATGACATTAATGGTTACTCTATTTCAACCAACCGCACTACTATGAGTACGGGAGAG  
CCATATCAGTCCTACACCAATTACTGTTGTAGAGCCTACAATGCGTGACACCCAGGCAG  
ACGTGCCCTCGACCAAAAAGGCTTGGGGCGCAACTTGCGTTCAAAGACTCGATGGTTC  
ACGGGATTCTGCAATTCACACCAAGTATCGCATTTTCGCTACGTTCTTCATCGATGCAAG  
AGCCGAGATATCCGTTGCCGAGAGTCATTCTTTATAATACATATCACGCATTACCCCACA  
CAATCTTATGTTAGATAGATGGGAAAACGTTTCATTTATCACAATTCCTTGGCACAATCC  
GTGCCGGGGTTGGTTATCTTGGCCACATGGGCCAGTCGAGAGGAGATGGAGCAAATGA  
CACCAAGCCCCCTCAACACATTTGTAAACATGTTTCACAGGTTGTTCTGCTTTGCAGGAT  
TCGA

S41-DT:

AATGCGTACTATTATCTTCATCCAAAGGTTTGCAGTACAGATGCAACCAACTCTAATGA  
CATGCCACATGATGACTTAACGAGGGCAAGCCAAGGCAAACCACCGCTCATCATGAAA

TACATGACATTAATGGTACTCTATTTCAACCAACCGCACTACTATGAGTACGGGAGAG  
CCATATCAGTCCTACACCAATTACTGTTGTAGAGCCTACAATGCGTGACACCCAGGCAG  
ACGTGCCCTCGACCAAAAAGGCTTGGGGCGCAACTTGCGTTCAAAGACTCGATGGTTC  
ACGGGATTCTGCAATTCACACCAAGTATCGCATTTTCGCTACGTTCTTCATCGATGCAAG  
AGCCGAGATATCCGTTGCCGAGAGTCATTCTTTATAATACATATCACGTATTACCCACA  
CAATCTTATGTTAGATAGATGGGAAAACGTTTCATTTATCACAATTCCTTGGCACAATCC  
GTGCCGGGGTGGTTATCTTGGCCACATGGGCCAGTCGAGAGGAGATGGAGCAAATGA  
CACCAAGCCCCCTCAACACATTTGTAAACATGTTTCACAGGTTGTTCTGCTTTGCAGGAT  
TCGA

S42-DT:

AATGCGTACTATTATCTTCATCCAAAGGTTTGCAGTACAGATGCAACCAACTCTAATGA  
CATGCCACATGATGACTTAACGAGGGCAAGCCAAGGCAAACCACCGCTCATCATGAAA  
TACATGACATTAATGGTACTCTATTTCAACCAACCGCACTACTATGAGTACGGGAGAG  
CCATATCAGTCCTACACCAATTACTGTTGTAGAGCCTACAATGCGTGACACCCAGGCAG  
ACGTGCCCTCGACCAAAAAGGCTTGGGGCGCAACTTGCGTTCAAAGACTCGATGGTTC  
ACGGGATTCTGCAATTCACACCAAGTATCGCATTTTCGCTACGTTCTTCATCGATGCAAG  
AGCCGAGATATCCGTTGCCGAGAGTCATTCTTTATAATACATATCACGTATTACCCACA  
CAATCTTATGTTAGATAGATGGGAAAACGTTTCATTTATCACAATTCCTTGGCACAATCC  
GTGCCGGGGTGGTTATCTTGGCCACATGGGCCAGTCGAGAGGAGATGGAGCAAATGA  
CACCAAGCCCCCTCAACACATTTGTAAACATGTTTCACAGGTTGTTCTGCTTTGCAGGAT  
TCGA

S43-DT:

AATGCGTACTATTATCTTCATCCAAAGGTTTGCAGTACAGATGCAACCAACTCNAATGA  
CATGCCACATGATGACTTAACGAGGGCAAGCCAAGGCAAACCACCGCTCATCATGAAA  
TACATGACATTAATGGTACTCTATTTCAACCAACCGCACTACTATGAGTACGGGAGAG  
CCATATCAGTCCTACACCAATTACTGTTGTAGAGCCTACAATGCGTGACACCCAGGCAG  
ACGTGCCCTCGACCAAAAAGGCTTGGGGCGCAACTTGCGTTCAAAGACTCGATGGTTC  
ACGGGATTCTGCAATTCACACCAAGTATCGCATTTTCGCTACGTTCTTCATCGATGCAAG  
AGCCGAGATATCCGTTGCCGAGAGTCATTCTTTATAATACATATCACGNATTACCCACA  
CAATCTTATGTTAGATAGATGGGAAAACGTTTCATTTATCACAATTCCTTGGCACAATCC  
GTGCCGGGGTGGTTATCTTGGCCACATGGGCCAGTCGAGAGGAGATGGAGCAAATGA  
CACCAAGCCCCCTCAACACATTTGTAAACATGTTTCACAGGTTGTTCTGCTTTGCAGGAT  
TCGA

S44-DT:

AATGCGTACTATTATCTTCATCCAAAGGTTTGCAGTACAGATGCAACCAACTCCAATGA  
CATGCCACATGATGACTTAACGAGGGCAAGCCAAGGCAAACCACCGCTCATCATGAAA  
TACATGACATTAATGGTACTCTATTTCAACCAACCGCACTACTATGAGTACGGGAGAG  
CCATATCAGTCCTACACCAATTACTGTTGTAGAGCCTACAATGCGTGACACCCAGGCAG  
ACGTGCCCTCGACCAAAAAGGCTTGGGGCGCAACTTGCGTTCAAAGACTCGATGGTTC  
ACGGGATTCTGCAATTCACACCAAGTATCGCATTTTCGCTACGTTCTTCATCGATGCAAG  
AGCCGAGATATCCGTTGCCGAGAGTCATTCTTTATAATACATATCACGTATTACCCACA  
CAATCTTATGTTAGATAGATGGGAAAACGTTTCATTTATCACAATTCCTTGGCACAATCC  
GTGCCGGGGTGGTTATCTTGGCCACATGGGCCAGTCGAGAGGAGATGGAGCAAATGA  
CACCAAGCCCCCTCAACACATTTGTAAACATGTTTCACAGGTTGTTCTGCTTTGCAGGAT

TCGA

S45-DT:

AATGCGTACTATTATCTTCATCCAAAGGTTTGCAGTACAGATGCAACCAACTCTAATGA  
CATGCCACATGATGACTTAACGAGGGCAAGCCAAGGCAAACCACCGCTCATCATGAAA  
TACATGACATTAATGGTACTCTATTTCAACCAACCGCACTACTATGAGTACGGGAGAG  
CCATATCAGTCCTACACCAATTACTGTTGTAGAGCCTACAATGCGTGACACCCAGGCAG  
ACGTGCCCTCGACCAAAAAGGCTTGGGGCGCAACTTGC GTTCAAAGACTCGATGGTTC  
ACGGGATTCTGCAATTCACACCAAGTATCGCATTTCGCTACGTTCTTCATCGATGCAAG  
AGCCGAGATATCCGTTGCCGAGAGTCATTCTTTATAATACATATCACGTATTACCCACA  
CAATCTTATGTTAGATAGATGGGAAAACGTTTCATTTATCACAATTCCTTGGCACAATCC  
GTGCCGGGGTTGGTTATCTTGGCCACATGGGCCAGTCGAGAGGAGATGGAGCAAATGA  
CACCAAGCCCCCTCAACACATTTGTAAACATGTTTACAGGTTGTTCTGCTTTGCAGGAT  
TCGA

S46-DT:

AATGCGTACTATTATCTTCATCCAAAGGTTTGCAGTACAGATGCAACCAACTCCAATGA  
CATGCCACATGATGACTTAACGAGGGCAAGCCAAGGCAAACCACCGCTCATCATGAAA  
TACATGACATTAATGGTACTCTATTTCAACCAACCGCACTACTATGAGTACGGGAGAG  
CCATATCAGTCCTACACCAATTACTGTTGTAGAGCCTACAATGCGTGACACCCAGGCAG  
ACGTGCCCTCGACCAAAAAGGCTTGGGGCGCAACTTGC GTTCAAAGACTCGATGGTTC  
ACGGGATTCTGCAATTCACACCAAGTATCGCATTTCGCTACGTTCTTCATCGATGCAAG  
AGCCGAGATATCCGTTGCCGAGAGTCATTCTTTATAATACATATCACGTATTACCCACA  
CAATCTTATGTTAGATAGATGGGAAAACGTTTCATTTATCACAATTCCTTGGCACAATCC  
GTGCCGGGGTTGGTTATCTTGGCCACATGGGCCAGTCGAGAGGAGATGGAGCAAATGA  
CACCAAGCCCCCTCAACACATTTGTAAACATGTTTACAGGTTGTTCTGCTTTGCAGGAT  
TCGA

S47-DT:

AATGCGTACTATTATCTTCATCCAAAGGTTTGCAGTACAGATGCAACCAACTCCAATGA  
CATGCCACATGATGACTTAACGAGGGCAAGCCAAGGCAAACCACCGCTCATCATGAAA  
TACATGACATTAATGGTACTCTATTTCAACCAACCGCACTACTATGAGTACGGGAGAG  
CCATATCAGTCCTACACCAATTACTGTTGTAGAGCCTACAATGCGTGACACCCAGGCAG  
ACGTGCCCTCGACCAAAAAGGCTTGGGGCGCAACTTGC GTTCAAAGACTCGATGGTTC  
ACGGGATTCTGCAATTCACACCAAGTATCGCATTTCGCTACGTTCTTCATCGATGCAAG  
AGCCGAGATATCCGTTGCCGAGAGTCATTCTTTATAATACATATCACGTATTACCCACA  
CAATCTTATGTTAGATAGATGGGAAAACGTTTCATTTATCACAATTCCTTGGCACAATCC  
GTGCCGGGGTTGGTTATCTTGGCCACATGGGCCAGTCGAGAGGAGATGGAGCAAATGA  
CACCAAGCCCCCTCAACACATTTGTAAACATGTTTACAGGTTGTTCTGCTTTGCAGGAT  
TCGA

S48-DT:

AATGCGTACTATTATCTTCATCCAAAGGTTTGCAGTACAGATGCAACCAACTCTAATGA  
CATGCCACATGATGACTTAACGAGGGCAAGCCAAGGCAAACCACCGCTCATCATGAAA  
TACATGACATTAATGGTACTCTATTTCAACCAACCGCACTACTATGAGTACGGGAGAG  
CCATATCAGTCCTACACCAATTACTGTTGTAGAGCCTACAATGCGTGACACCCAGGCAG  
ACGTGCCCTCGACCAAAAAGGCTTGGGGCGCAACTTGC GTTCAAAGACTCGATGGTTC  
ACGGGATTCTGCAATTCACACCAAGTATCGCATTTCGCTACGTTCTTCATCGATGCAAG

AGCCGAGATATCCGTTGCCGAGAGTCATTCTTTATAATACATATCACGTATTACCCCACA  
CAATCTTATGTTAGATAGATGGGAAAACGTTTCATTTATCACAATTCCTTGGCACAATCC  
GTGCCGGGGTTGGTTATCTTGGCCACATGGGCCAGTCGAGAGGAGATGGAGCAAATGA  
CACCAAGCCCCCTCAACACATTTGTAAACATGTTTCACAGGTTGTTCTGCTTTGCAGGAT  
TCGA

S49-DT:

AATGCGTACTATTATCTTCATCCAAAGGTTTGCAGTACAGATGCAACCAACTCCAATGA  
CATGCCACATGATGACTTAACGAGGGCAAGCCAAGGCAAACCACCGCTCATCATGAAA  
TACATGACATTAATGGTTACTCTATTTCAACCAACCGCACTACTATGAGTACGGGAGAG  
CCATATCAGTCCTACACCAATTACTGTTGTAGAGCCTACAATGCGTGACACCCAGGCAG  
ACGTGCCCTCGACCAAAAAGGCTTGGGGCGCAACTTGCGTTCAAAGACTCGATGGTTC  
ACGGGATTCTGCAATTCACACCAAGTATCGCATTTTCGCTACGTTCTTCATCGATGCAAG  
AGCCGAGATATCCGTTGCCGAGAGTCATTCTTTATAATACATATCACGTATTACCCCACA  
CAATCTTATGTTAGATAGATGGGAAAACGTTTCATTTATCACAATTCCTTGGCACAATCC  
GTGCCGGGGTTGGTTATCTTGGCCACATGGGCCAGTCGAGAGGAGATGGAGCAAATGA  
CACCAAGCCCCCTCAACACATTTGTAAACATGTTTCACAGGTTGTTCTGCTTTGCAGGAT  
TCGA

S50-DT:

AATGCGTACTATTATCTTCATCCAAAGGTTTGCAGTACAGATGCAACCAACTCCAATGA  
CATGCCACATGATGACTTAACGAGGGCAAGCCAAGGCAAACCACCGCTCATCATGAAA  
TACATGACATTAATGGTTACTCTATTTCAACCAACCGCACTACTATGAGTACGGGAGAG  
CCATATCAGTCCTACACCAATTACTGTTGTAGAGCCTACAATGCGTGACACCCAGGCAG  
ACGTGCCCTCGACCAAAAAGGCTTGGGGCGCAACTTGCGTTCAAAGACTCGATGGTTC  
ACGGGATTCTGCAATTCACACCAAGTATCGCATTTTCGCTACGTTCTTCATCGATGCAAG  
AGCCGAGATATCCGTTGCCGAGAGTCATTCTTTATAATACATATCACGTATTACCCCACA  
CAATCTTATGTTAGATAGATGGGAAAACGTTTCATTTATCACAATTCCTTGGCACAATCC  
GTGCCGGGGTTGGTTATCTTGGCCACATGGGCCAGTCGAGAGGAGATGGAGCAAATGA  
CACCAAGCCCCCTCAACACATTTGTAAACATGTTTCACAGGTTGTTCTGCTTTGCAGGAT  
TCGA

S51-DT:

AATGCGTACTATTATCTTCATCCAAAGGTTTGCAGTACAGATGCAACCAACTCCAATGA  
CATGCCACATGATGACTTAACGAGGGCAAGCCAAGGCAAACCACCGCTCATCATGAAA  
TACATGACATTAATGGTTACTCTATTTCAACCAACCGCACTACTATGAGTACGGGAGAG  
CCATATCAGTCCTACACCAATTACTGTTGTAGAGCCTACAATGCGTGACACCCAGGCAG  
ACGTGCCCTCGACCAAAAAGGCTTGGGGCGCAACTTGCGTTCAAAGACTCGATGGTTC  
ACGGGATTCTGCAATTCACACCAAGTATCGCATTTTCGCTACGTTCTTCATCGATGCAAG  
AGCCGAGATATCCGTTGCCGAGAGTCATTCTTTATAATACATATCACGTATTACCCCACA  
CAATCTTATGTTAGATAGATGGGAAAACGTTTCATTTATCACAATTCCTTGGCACAATCC  
GTGCCGGGGTTGGTTATCTTGGCCACATGGGCCAGTCGAGAGGAGATGGAGCAAATGA  
CACCAAGCCCCCTCAACACATTTGTAAACATGTTTCACAGGTTGTTCTGCTTTGCAGGAT  
TCGA

S52-DT:

AATGCGTACTATTATCTTCATCCAAAGGTTTGCAGTACAGATGCAACCAACTCCAATGA  
CATGCCACATGATGACTTAACGAGGGCAAGCCAAGGCAAACCACCGCTCATCATGAAA

TACATGACATTAATGGTACTCTATTTCAACCAACCGCACTACTATGAGTACGGGAGAG  
CCATATCAGTCCTACACCAATTACTGTTGTAGAGCCTACAATGCGTGACACCCAGGCAG  
ACGTGCCCTCGACCAAAAAGGCTTGGGGCGCAACTTGCGTTCAAAGACTCGATGGTTC  
ACGGGATTCTGCAATTCACACCAAGTATCGCATTTTCGCTACGTTCTTCATCGATGCAAG  
AGCCGAGATATCCGTTGCCGAGAGTCATTCTTTATAATACATATCACGTATTACCCACA  
CAATCTTATGTTAGATAGATGGGAAAACGTTTCATTTATCACAATTCCTTGGCACAATCC  
GTGCCGGGGTGGTTATCTTGGCCACATGGGCCAGTCGAGAGGAGATGGAGCAAATGA  
CACCAAGCCCCCTCAACACATTTGTAAACATGTTTCACAGGTTGTTCTGCTTTGCAGGAT  
TCGA

S53-DT:

AATGCGTACTATTATCTTCATCCAAAGGTTTGCAGTACAGATGCAACCAACTCTAATGA  
CATGCCACATGATGACTTAACGAGGGCAAGCCAAGGCAAACCACCGCTCATCATGAAA  
TACATGACATTAATGGTACTCTATTTCAACCAACCGCACTACTATGAGTACGGGAGAG  
CCATATCAGTCCTACACCAATTACTGTTGTAGAGCCTACAATGCGTGACACCCAGGCAG  
ACGTGCCCTCGACCAAAAAGGCTTGGGGCGCAACTTGCGTTCAAAGACTCGATGGTTC  
ACGGGATTCTGCAATTCACACCAAGTATCGCATTTTCGCTACGTTCTTCATCGATGCAAG  
AGCCGAGATATCCGTTGCCGAGAGTCATTCTTTATAATACATATCACGTATTACCCACA  
CAATCTTATGTTAGATAGATGGGAAAACGTTTCATTTATCACAATTCCTTGGCACAATCC  
GTGCCGGGGTGGTTATCTTGGCCACATGGGCCAGTCGAGAGGAGATGGAGCAAATGA  
CACCAAGCCCCCTCAACACATTTGTAAACATGTTTCACAGGTTGTTCTGCTTTGCAGGAT  
TCGA

S54-DT:

AATGCGTACTATTATCTTCATCCAAAGGTTTGCAGTACAGATGCAACCAACTCTAATGA  
CATGCCACATGATGACTTAACGAGGGCAAGCCAAGGCAAACCACCGCTCATCATGAAA  
TACATGACATTAATGGTACTCTATTTCAACCAACCGCACTACTATGAGTACGGGAGAG  
CCATATCAGTCCTACACCAATTACTGTTGTAGAGCCTACAATGCGTGACACCCAGGCAG  
ACGTGCCCTCGACCAAAAAGGCTTGGGGCGCAACTTGCGTTCAAAGACTCGATGGTTC  
ACGGGATTCTGCAATTCACACCAAGTATCGCATTTTCGCTACGTTCTTCATCGATGCAAG  
AGCCGAGATATCCGTTGCCGAGAGTCATTCTTTATAATACATATCACGTATTACCCACA  
CAATCTTATGTTAGATAGATGGGAAAACGTTTCATTTATCACAATTCCTTGGCACAATCC  
GTGCCGGGGTGGTTATCTTGGCCACATGGGCCAGTCGAGAGGAGATGGAGCAAATGA  
CACCAAGCCCCCTCAACACATTTGTAAACATGTTTCACAGGTTGTTCTGCTTTGCAGGAT  
TCGA

S55-DT:

AATGCGTACTATTATCTTCATCCAAAGGTTTGCAGTACAGATGCAACCAACTCTAATGA  
CATGCCACATGATGACTTAACGAGGGCAAGCCAAGGCAAACCACCGCTCATCATGAAA  
TACATGACATTAATGGTACTCTATTTCAACCAACCGCACTACTATGAGTACGGGAGAG  
CCATATCAGTCCTACACCAATTACTGTTGTAGAGCCTACAATGCGTGACACCCAGGCAG  
ACGTGCCCTCGACCAAAAAGGCTTGGGGCGCAACTTGCGTTCAAAGACTCGATGGTTC  
ACGGGATTCTGCAATTCACACCAAGTATCGCATTTTCGCTACGTTCTTCATCGATGCAAG  
AGCCGAGATATCCGTTGCCGAGAGTCATTCTTTATAATACATATCACGTATTACCCACA  
CAATCTTATGTTAGATAGATGGGAAAACGTTTCATTTATCACAATTCCTTGGCACAATCC  
GTGCCGGGGTGGTTATCTTGGCCACATGGGCCAGTCGAGAGGAGATGGAGCAAATGA  
CACCAAGCCCCCTCAACACATTTGTAAACATGTTTCACAGGTTGTTCTGCTTTGCAGGAT

TCGA

S56-DT:

AATGCGTACTATTATCTTCATCCAAAGGTTTGCAGTACAGATGCAACCAACTCTAATGA  
CATGCCACATGATGACTTAACGAGGGCAAGCCAAGGCAAACCACCGCTCATCATGAAA  
TACATGACATTAATGGTACTCTATTTCAACCAACCGCACTACTATGAGTACGGGAGAG  
CCATATCAGTCCTACACCAATTACTGTTGTAGAGCCTACAATGCGTGACACCCAGGCAG  
ACGTGCCCTCGACCAAAAAGGCTTGGGGCGCAACTTGC GTTCAAAGACTCGATGGTTC  
ACGGGATTCTGCAATTCACACCAAGTATCGCATTTCGCTACGTTCTTCATCGATGCAAG  
AGCCGAGATATCCGTTGCCGAGAGTCATTCTTTATAATACATATCACGTATTACCCACA  
CAATCTTATGTTAGATAGATGGGAAAACGTTTCATTTATCACAATTCCTTGGCACAATCC  
GTGCCGGGGTTGGTTATCTTGGCCACATGGGCCAGTCGAGAGGAGATGGAGCAAATGA  
CACCAAGCCCCCTCAACACATTTGTAAACATGTTTACAGGTTGTTCTGCTTTGCAGGAT  
TCGA

S57-DT:

AATGCGTACTATTATCTTCATCCAAAGGTTTGCAGTACAGATGCAACCAACTCTAATGA  
CATGCCACATGATGACTTAACGAGGGCAAGCCAAGGCAAACCACCGCTCATCATGAAA  
TACATGACATTAATGGTACTCTATTTCAACCAACCGCACTACTATGAGTACGGGAGAG  
CCATATCAGTCCTACACCAATTACTGTTGTAGAGCCTACAATGCGTGACACCCAGGCAG  
ACGTGCCCTCGACCAAAAAGGCTTGGGGCGCAACTTGC GTTCAAAGACTCGATGGTTC  
ACGGGATTCTGCAATTCACACCAAGTATCGCATTTCGCTACGTTCTTCATCGATGCAAG  
AGCCGAGATATCCGTTGCCGAGAGTCATTCTTTATAATACATATCACGTATTACCCACA  
CAATCTTATGTTAGATAGATGGGAAAACGTTTCATTTATCACAATTCCTTGGCACAATCC  
GTGCCGGGGTTGGTTATCTTGGCCACATGGGCCAGTCGAGAGGAGATGGAGCAAATGA  
CACCAAGCCCCCTCAACACATTTGTAAACATGTTTACAGGTTGTTCTGCTTTGCAGGAT  
TCGA

S58-DT:

AATGCGTACTATTATCTTCATCCAAAGGTTTGCAGTACAGATGCAACCAACTCTAATGA  
CATGCCACATGATGACTTAACGAGGGCAAGCCAAGGCAAACCACCGCTCATCATGAAA  
TACATGACATTAATGGTACTCTATTTCAACCAACCGCACTACTATGAGTACGGGAGAG  
CCATATCAGTCCTACACCAATTACTGTTGTAGAGCCTACAATGCGTGACACCCAGGCAG  
ACGTGCCCTCGACCAAAAAGGCTTGGGGCGCAACTTGC GTTCAAAGACTCGATGGTTC  
ACGGGATTCTGCAATTCACACCAAGTATCGCATTTCGCTACGTTCTTCATCGATGCAAG  
AGCCGAGATATCCGTTGCCGAGAGTCATTCTTTATAATACATATCACGTATTACCCACA  
CAATCTCATGTTAGATAGATGGGAAAACGTTTCATTTATCACAATTCCTTGGCACAATCC  
GCGCCGGGGTTGGTTATCTTGGCCACATGGGCCAGTCGAGAGGAGATGAAGCAAATGA  
CACCAAGCCCCCTCAACACATTTGTAAACATGTTTACAGGTTGTTCTGCTTTGCAGGAT  
TCGA

S59-DT:

AATGCGTACTATTATCTTCATCCAAAGGTTTGCAGTACAGATGCAACCAACTCTAATGA  
CATGCCACATGATGACTTAACGAGGGCAAGCCAAGGCAAACCACCGCTCATCATGAAA  
TACATGACATTAATGGTACTCTATTTCAACCAACCGCACTACTATGAGTACGGGAGAG  
CCATATCAGTCCTACACCAATTACTGTTGTAGAGCCTACAATGCGTGACACCCAGGCAG  
ACGTGCCCTCGACCAAAAAGGCTTGGGGCGCAACTTGC GTTCAAAGACTCGATGGTTC  
ACGGGATTCTGCAATTCACACCAAGTATCGCATTTCGCTACGTTCTTCATCGATGCAAG



AGCCGAGATATCCGTTGCCGAGAGTCATTCTTTATAATACATATCACGTATTACCCCACA  
CAATCTCATGTTAGATAGATGGGAAAACGTTTCATTTATCACAATTCCTTGGCACAATCC  
GCGCCGGGGTTGGTTATCTTGGCCACATGGGCCAGTCGAGAGGAGATGAAGCAAATGA  
CACCAAGCCCCCTCAACACATTTGTAAACATGTTTACAGGTTGTTCTGCTTTGCAGGAT  
TCGA

S60-DT:

AATGCGTACTATTATCTTCATCCAAAGGTTTGCAGTACAGATGCAACCAACTCTAATGA  
CATGCCACATGATGACTTAACGAGGGCAAGCCAAGGCAAACCACCGCTCATCATGAAA  
TACATGACATTAATGGTTACTCTATTTCAACCAACCGCACTACTATGAGTACGGGAGAG  
CCATATCAGTCCTACACCAATTACTGTTGTAGAGCCTACAATGCGTGACACCCAGGCAG  
ACGTGCCCTCGACCAAAGGCTTGGGGCGCAACTTGCGTTCAAAGACTCGATGGTTC  
ACGGGATTCTGCAATTCACACCAAGTATCGCATTTTCGCTACGTTCTTCATCGATGCAAG  
AGCCGAGATATCCGTTGCCGAGAGTCATTCTTTATAATACATATCACGTATTACCCCACA  
CAATCTCATGTTAGATAGATGGGAAAACGTTTCATTTATCACAATTCCTTGGCACAATCC  
GCGCCGGGGTTGGTTATCTTGGCCACATGGGCCAGTCGAGAGGAGATGAAGCAAATGA  
CACCAAGCCCCCTCAACACATTTGTAAACATGTTTACAGGTTGTTCTGCTTTGCAGGAT  
TCGA

S61-DT:

AATGCGTACTATTATCTTCATCCAAAGGTTTGCAGTACAGATGCAACCAACTCTAATGA  
CATGCCACATGATGACTTAACGAGGGCAAGCCAAGGCAAACCACCGCTCATCATGAAA  
TACATGACATTAATGGTTACTCTATTTCAACCAACCGCACTACTATGAGTACGGGAGAG  
CCATATCAGTCCTACACCAATTACTGTTGTAGAGCCTACAATGCGTGACACCCAGGCAG  
ACGTGCCCTCGACCAAAGGCTTGGGGCGCAACTTGCGTTCAAAGACTCGATGGTTC  
ACGGGATTCTGCAATTCACACCAAGTATCGCATTTTCGCTACGTTCTTCATCGATGCAAG  
AGCCGAGATATCCGTTGCCGAGAGTCATTCTTTATAATACATATCACGTATTACCCCACA  
CAATCTCATGTTAGATAGATGGGAAAACGTTTCATTTATCACAATTCCTTGGCACAATCC  
GCGCCGGGGTTGGTTATCTTGGCCACATGGGCCAGTCGAGAGGAGATGAAGCAAATGA  
CACCAAGCCCCCTCAACACATTTGTAAACATGTTTACAGGTTGTTCTGCTTTGCAGGAT  
TCGA

S62-DT:

AATGCGTACTATTATCTTCATCCAAAGGTTTGCAGTACAGATGCAACCAACTCTAATGA  
CATGCCACATGATGACTTAACGAGGGCAAGCCAAGGCAAACCACCGCTCATCATGAAA  
TACATGACATTAATGGTTACTCTATTTCAACCAACCGCACTACTATGAGTACGGGAGAG  
CCATATCAGTCCTACACCAATTACTGTTGTAGAGCCTACAATGCGTGACACCCAGGCAG  
ACGTGCCCTCGACCAAAGGCTTGGGGCGCAACTTGCGTTCAAAGACTCGATGGTTC  
ACGGGATTCTGCAATTCACACCAAGTATCGCATTTTCGCTACGTTCTTCATCGATGCAAG  
AGCCGAGATATCCGTTGCCGAGAGTCATTCTTTATAATACATATCACGTATTACCCCACA  
CAATCTCATGTTAGATAGATGGGAAAACGTTTCATTTATCACAATTCCTTGGCACAATCC  
GCGCCGGGGTTGGTTATCTTGGCCACATGGGCCAGTCGAGAGGAGATGAAGCAAATGA  
CACCAAGCCCCCTCAACACATTTGTAAACATGTTTACAGGTTGTTCTGCTTTGCAGGAT  
TCGA

S63-DT:

AATGCGTACTATTATCTTCATCCAAAGGTTTGCAGTACAGATGCAACCAACTCTAATGA  
CATGCCACATGATGACTTAACGAGGGCAAGCCAAGGCAAACCACCGCTCATCATGAAA

TACATGACATTAATGGT TACTCTATTTCAACCAACCGCACTACTATGAGTACGGGAGAG  
CCATATCAGTCCTACACCAATTACTGTTGTAGAGCCTACAATGCGTGACACCCAGGCAG  
ACGTGCCCTCGACCAAAAAGGCTTGGGGCGCAACTTGCGTTCAAAGACTCGATGGTTC  
ACGGGATTCTGCAATTCACACCAAGTATCGCATTTTCGCTACGTTCTTCATCGATGCAAG  
AGCCGAGATATCCGTTGCCGAGAGTCATTCTTTATAATACATATCACGTATTACCCACA  
CAATCTCATGTTAGATAGATGGGAAAACGTTTCATTTATCACAATTCCTTGGCACAATCC  
GCGCCGGGGTTGGTTATCTTGGCCACATGGGCCAGTCGAGAGGAGATGAAGCAAATGA  
CACCAAGCCCCCTCAACACATTTGTAAACATGTTTCACAGGTTGTTCTGCTTTGCAGGAT  
TCGA

S64-DT:

AATGCGTACTATTATCTTCATCCAAAGGTTTGCAGTACAGATGCAACCAACTCTAATGA  
CATGCCACATGATGACTTAACGAGGGCAAGCCAAGGCAAACCACCGCTCATCATGAAA  
TACATGACATTAATGGT TACTCTATTTCAACCAACCGCACTACTATGAGTACGGGAGAG  
CCATATCAGTCCTACACCAATTACTGTTGTAGAGCCTACAATGCGTGACACCCAGGCAG  
ACGTGCCCTCGACCAAAAAGGCTTGGGGCGCAACTTGCGTTCAAAGACTCGATGGTTC  
ACGGGATTCTGCAATTCACACCAAGTATCGCATTTTCGCTACGTTCTTCATCGATGCAAG  
AGCCGAGATATCCGTTGCCGAGAGTCATTCTTTATAATACATATCACGTATTACCCACA  
CAATCTCATGTTAGATAGATGGGAAAACGTTTCATTTATCACAATTCCTTGGCACAATCC  
GCGCCGGGGTTGGTTATCTTGGCCACATGGGCCAGTCGAGAGGAGATGAAGCAAATGA  
CACCAAGCCCCCTCAACACATTTGTAAACATGTTTCACAGGTTGTTCTGCTTTGCAGGAT  
TCGA

S65-DT:

AATGCGTACTATTATCTTCATCCAAAGGTTTGCAGTACAGATGCAACCAACTCTAATGA  
CATGCCACATGATGACTTAACGAGGGCAAGCCAAGGCAAACCACCGCTCATCATGAAA  
TACATGACATTAATGGT TACTCTATTTCAACCAACCGCACTACTATGAGTACGGGAGAG  
CCATATCAGTCCTACACCAATTACTGTTGTAGAGCCTACAATGCGTGACACCCAGGCAG  
ACGTGCCCTCGACCAAAAAGGCTTGGGGCGCAACTTGCGTTCAAAGACTCGATGGTTC  
ACGGGATTCTGCAATTCACACCAAGTATCGCATTTTCGCTACGTTCTTCATCGATGCAAG  
AGCCGAGATATCCGTTGCCGAGAGTCATTCTTTATAATACATATCACGTATTACCCACA  
CAATCTCATGTTAGATAGATGGGAAAACGTTTCATTTATCACAATTCCTTGGCACAATCC  
GCGCCGGGGTTGGTTATCTTGGCCACATGGGCCAGTCGAGAGGAGATGAAGCAAATGA  
CACCAAGCCCCCTCAACACATTTGTAAACATGTTTCACAGGTTGTTCTGCTTTGCAGGAT  
TCGA

S66-DR:

AATGCGTACTATTATCTTCATCCAAAGGTTTGCAGTACAGATGCAACCAACTCTAATGA  
AATGCCACATGATGACTTAACGAGGGCAAGCCAAGGCAAACCACCGCTCATCATGAAA  
TACATGACATTAATGGT TACTCTATTTCAACCAACCACACTACTATGAGTACGGGAGAG  
CCATATCAGTCCTACACCAATTACTGTTGTAGAGCCTACAATGCGTGACACCCAGGCAG  
ACGTGCCCTCGACCAAAAAGGCTTGGGGCGCAACTTGCGTTCAAAGACTCGATGGTTC  
ACGGGATTCTGCAATTCACACCAAGTATCGCATTTTCGCTACGTTCTTCATCGATGCAAG  
AGCCGAGATATCCGTTGCCGAGAGTCATTCTTTATAATACATATCACGTATTACCCACA  
CAATCTTATGTTAGATAGATGGGAAAACGTTTCATTTATCACAATTCCTTGGCACAATCC  
GTGCCGGGGTTGGTTATCTTGGCCACATGGGCCAGTCGAGAGGAGATGGAGCAAATGA  
CACCAAGCCCCCTCAACACATTTGTAAACATGTTTCACAGGTTGTTCTGCTTTGCAGGAT

TCGA

S67-DR:

AATGCGTACTATTATCTTCATCCAAAGGTTTGCAGTACAGATGCAACCAACTCTAATGA  
AATGCCACATGATGACTTAACGAGGGCAAGCCAAGGCAAACCACCGCTCATCATGAAA  
TACATGACATTAATGGTACTCTATTTCAACCAACCACACTACTATGAGTACGGGAGAG  
CCATATCAGTCCTACACCAATTACTGTTGTAGAGCCTACAATGCGTGACACCCAGGCAG  
ACGTGCCCTCGACCAAAAAGGCTTGGGGCGCAACTTGC GTTCAAAGACTCGATGGTTC  
ACGGGATTCTGCAATTCACACCAAGTATCGCATTTCGCTACGTTCTTCATCGATGCAAG  
AGCCGAGATATCCGTTGCCGAGAGTCATTCTTTATAATACATATCACGTATTACCCACA  
CAATCTTATGTTAGATAGATGGGAAAACGTTTCATTATCACAATTCCTTGGCACAATCC  
GTGCCGGGGTTGGTTATCTTGGCCACATGGGCCAGTCGAGAGGAGATGGAGCAAATGA  
CACCAAGCCCCCTCAACACATTTGTAAACATGTTTACAGGTTGTTCTGCTTTGCAGGAT  
TCGA

S68-DR:

AATGCGTACTATTATCTTCATCCAAAGGTTTGCAGTACAGATGCAACCAACTCTAATGA  
AATGCCACATGATGACTTAACGAGGGCAAGCCAAGGCAAACCACCGCTCATCATGAAA  
TACATGACATTAATGGTACTCTATTTCAACCAACCACACTACTATGAGTACGGGAGAG  
CCATATCAGTCCTACACCAATTACTGTTGTAGAGCCTACAATGCGTGACACCCAGGCAG  
ACGTGCCCTCGACCAAAAAGGCTTGGGGCGCAACTTGC GTTCAAAGACTCGATGGTTC  
ACGGGATTCTGCAATTCACACCAAGTATCGCATTTCGCTACGTTCTTCATCGATGCAAG  
AGCCGAGATATCCGTTGCCGAGAGTCATTCTTTATAATACATATCACGTATTACCCACA  
CAATCTTATGTTAGATAGATGGGAAAACGTTTCATTATCACAATTCCTTGGCACAATCC  
GTGCCGGGGTTGGTTATCTTGGCCACATGGGCCAGTCGAGAGGAGATGGAGCAAATGA  
CACCAAGCCCCCTCAACACATTTGTAAACATGTTTACAGGTTGTTCTGCTTTGCAGGAT  
TCGA

S69-DR:

AATGCGTACTATTATCTTCATCCAAAGGTTTGCAGTACAGATGCAACCAACTCTAATGA  
AATGCCACATGATGACTTAACGAGGGCAAGCCAAGGCAAACCACCGCTCATCATGAAA  
TACATGACATTAATGGTACTCTATTTCAACCAACCACACTACTATGAGTACGGGAGAG  
CCATATCAGTCCTACACCAATTACTGTTGTAGAGCCTACAATGCGTGACACCCAGGCAG  
ACGTGCCCTCGACCAAAAAGGCTTGGGGCGCAACTTGC GTTCAAAGACTCGATGGTTC  
ACGGGATTCTGCAATTCACACCAAGTATCGCATTTCGCTACGTTCTTCATCGATGCAAG  
AGCCGAGATATCCGTTGCCGAGAGTCATTCTTTATAATACATATCACGTATTACCCACA  
CAATCTTATGTTAGATAGATGGGAAAACGTTTCATTATCACAATTCCTTGGCACAATCC  
GTGCCGGGGTTGGTTATCTTGGCCACATGGGCCAGTCGAGAGGAGATGGAGCAAATGA  
CACCAAGCCCCCTCAACACATTTGTAAACATGTTTACAGGTTGTTCTGCTTTGCAGGAT  
TCGA

S70-DR:

AATGCGTACTATTATCTTCATCCAAAGGTTTGCAGTACAGATGCAACCAACTCTAATGA  
AATGCCACATGATGACTTAACGAGGGCAAGCCAAGGCAAACCACCGCTCATCATGAAA  
TACATGACATTAATGGTACTCTATTTCAACCAACCNC ACTACTATGAGTACGGGAGAG  
CCATATCAGTCCTACACCAATTACTGTTGTAGAGCCTACAATGCGTGACACCCAGGCAG  
ACGTGCCCTCGACCAAAAAGGCTTGGGGCGCAACTTGC GTTCAAAGACTCGATGGTTC  
ACGGGATTCTGCAATTCACACCAAGTATCGCATTTCGCTACGTTCTTCATCGATGCAAG

AGCCGAGATATCCGTTGCCGAGAGTCATTCTTTATAATACATATCACGTATTACCCCACA  
CAATCTTATGTTAGATAGATGGGAAAACGTTTCATTTATCACAATTCCTTGGCACAATCC  
GTGCCGGGGTTGGTTATCTTGGCCACATGGGCCAGTCGAGAGGAGATGGAGCAAATGA  
CACCAAGCCCCCTCAACACATTTGTAAACATGTTTCACAGGTTGTTCTGCTTTGCAGGAT  
TCGA

S71-DR:

AATGCGTACTATTATCTTCATCCAAAGGTTTGCAGTACAGATGCAACCAACTCTAATGA  
AATGCCACATGATGACTTAACGAGGGCAAGCCAAGGCAAACCACCGCTCATCATGAAA  
TACATGACATTAATGGTTACTCTATTTCAACCAACCNCACTACTATGAGTACGGGAGAG  
CCATATCAGTCCTACACCAATTACTGTTGTAGAGCCTACAATGCGTGACACCCAGGCAG  
ACGTGCCCTCGACCAAAAAGGCTTGGGGCGCAACTTGCGTTCAAAGACTCGATGGTTC  
ACGGGATTCTGCAATTCACACCAAGTATCGCATTTTCGCTACGTTCTTCATCGATGCAAG  
AGCCGAGATATCCGTTGCCGAGAGTCATTCTTTATAATACATATCACGTATTACCCCACA  
CAATCTTATGTTAGATAGATGGGAAAACGTTTCATTTATCACAATTCCTTGGCACAATCC  
GTGCCGGGGTTGGTTATCTTGGCCACATGGGCCAGTCGAGAGGAGATGGAGCAAATGA  
CACCAAGCCCCCTCAACACATTTGTAAACATGTTTCACAGGTTGTTCTGCTTTGCAGGAT  
TCGA

S72-DR:

AATGCGTACTATTATCTTCATCCAAAGGTTTGCAGTACAGATGCAACCAACTCTAATGA  
AATGCCACATGATGACTTAACGAGGGCAAGCCAAGGCAAACCACCGCTCATCATGAAA  
TACATGACATTAATGGTTACTCTATTTCAACCAACCNCACTACTATGAGTACGGGAGAG  
CCATATCAGTCCTACACCAATTACTGTTGTAGAGCCTACAATGCGTGACACCCAGGCAG  
ACGTGCCCTCGACCAAAAAGGCTTGGGGCGCAACTTGCGTTCAAAGACTCGATGGTTC  
ACGGGATTCTGCAATTCACACCAAGTATCGCATTTTCGCTACGTTCTTCATCGATGCAAG  
AGCCGAGATATCCGTTGCCGAGAGTCATTCTTTATAATACATATCACGTATTACCCCACA  
CAATCTTATGTTAGATAGATGGGAAAACGTTTCATTTATCACAATTCCTTGGCACAATCC  
GTGCCGGGGTTGGTTATCTTGGCCACATGGGCCAGTCGAGAGGAGATGGAGCAAATGA  
CACCAAGCCCCCTCAACACATTTGTAAACATGTTTCACAGGTTGTTCTGCTTTGCAGGAT  
TCGA

S73-DR:

AATGCGTACTATTATCTTCATCCAAAGGTTTGCAGTACAGATGCAACCAACTCTAATGA  
AATGCCACATGATGACTTAACGAGGGCAAGCCAAGGCAAACCACCGCTCATCATGAAA  
TACATGACATTAATGGTTACTCTATTTCAACCAACCACACTACTATGAGTACGGGAGAG  
CCATATCAGTCCTACACCAATTACTGTTGTAGAGCCTACAATGCGTGACACCCAGGCAG  
ACGTGCCCTCGACCAAAAAGGCTTGGGGCGCAACTTGCGTTCAAAGACTCGATGGTTC  
ACGGGATTCTGCAATTCACACCAAGTATCGCATTTTCGCTACGTTCTTCATCGATGCAAG  
AGCCGAGATATCCGTTGCCGAGAGTCATTCTTTATAATACATATCACGTATTACCCCACA  
CAATCTTATGTTAGATAGATGGGAAAACGTTTCATTTATCACAATTCCTTGGCACAATCC  
GTGCCGGGGTTGGTTATCTTGGCCACATGGGCCAGTCGAGAGGAGATGGAGCAAATGA  
CACCAAGCCCCCTCAACACATTTGTAAACATGTTTCACAGGTTGTTCTGCTTTGCAGGAT  
TCGA

S74-DR:

AATGCGTACTATTATCTTCATCCAAAGGTTTGCAGTACAGATGCAACCAACTCTAATGA  
AATGCCACATGATGACTTAACGAGGGCAAGCCAAGGCAAACCACCGCTCATCATGAAA

TACATGACATTAATGGTACTCTATTTCAACCAACCACACTACTATGAGTACGGGAGAG  
CCATATCAGTCCTACACCAATTACTGTTGTAGAGCCTACAATGCGTGACACCCAGGCAG  
ACGTGCCCTCGACCAAAAAGGCTTGGGGCGCAACTTGCGTTCAAAGACTCGATGGTTC  
ACGGGATTCTGCAATTCACACCAAGTATCGCATTTTCGCTACGTTCTTCATCGATGCAAG  
AGCCGAGATATCCGTTGCCGAGAGTCATTCTTTATAATACATATCACGTATTACCCACA  
CAATCTTATGTTAGATAGATGGGAAAACGTTTCATTTATCACAATTCCTTGGCACAATCC  
GTGCCGGGGTGGTTATCTTGGCCACATGGGCCAGTCGAGAGGAGATGGAGCAAATGA  
CACCAAGCCCCCTCAACACATTTGTAAACATGTTTCACAGGTTGTTCTGCTTTGCAGGAT  
TCGA

S75-DR:

AATGCGTACTATTATCTTCATCCAAAGGTTTGCAGTACAGATGCAACCAACTCTAATGA  
AATGCCACATGATGACTTAACGAGGGCAAGCCAAGGCAAACCACCGCTCATCATGAAA  
TACATGACATTAATGGTACTCTATTTCAACCAACCNCACTACTATGAGTACGGGAGAG  
CCATATCAGTCCTACACCAATTACTGTTGTAGAGCCTACAATGCGTGACACCCAGGCAG  
ACGTGCCCTCGACCAAAAAGGCTTGGGGCGCAACTTGCGTTCAAAGACTCGATGGTTC  
ACGGGATTCTGCAATTCACACCAAGTATCGCATTTTCGCTACGTTCTTCATCGATGCAAG  
AGCCGAGATATCCGTTGCCGAGAGTCATTCTTTATAATACATATCACGTATTACCCACA  
CAATCTTATGTTAGATAGATGGGAAAACGTTTCATTTATCACAATTCCTTGGCACAATCC  
GTGCCGGGGTGGTTATCTTGGCCACATGGGCCAGTCGAGAGGAGATGGAGCAAATGA  
CACCAAGCCCCCTCAACACATTTGTAAACATGTTTCACAGGTTGTTCTGCTTTGCAGGAT  
TCGA

S76-DR:

AATGCGTACTATTATCTTCATCCAAAGGTTTGCAGTACAGATGCAACCAACTCTAATGA  
AATGCCACATGATGACTTAACGAGGGCAAGCCAAGGCAAACCACCGCTCATCATGAAA  
TACATGACATTAATGGTACTCTATTTCAACCAACCACACTACTATGAGTACGGGAGAG  
CCATATCAGTCCTACACCAATTACTGTTGTAGAGCCTACAATGCGTGACACCCAGGCAG  
ACGTGCCCTCGACCAAAAAGGCTTGGGGCGCAACTTGCGTTCAAAGACTCGATGGTTC  
ACGGGATTCTGCAATTCACACCAAGTATCGCATTTTCGCTACGTTCTTCATCGATGCAAG  
AGCCGAGATATCCGTTGCCGAGAGTCATTCTTTATAATACATATCACGTATTACCCACA  
CAATCTTATGTTAGATAGATGGGAAAACGTTTCATTTATCACAATTCCTTGGCACAATCC  
GTGCCGGGGTGGTTATCTTGGCCACATGGGCCAGTCGAGAGGAGATGGAGCAAATGA  
CACCAAGCCCCCTCAACACATTTGTAAACATGTTTCACAGGTTGTTCTGCTTTGCAGGAT  
TCGA

S77-DR:

AATGCGTACTATTATCTTCATCCAAAGGTTTGCAGTACAGATGCAACCAACTCTAATGA  
AATGCCACATGATGACTTAACGAGGGCAAGCCAAGGCAAACCACCGCTCATCATGAAA  
TACATGACATTAATGGTACTCTATTTCAACCAACCNCACTACTATGAGTACGGGAGAG  
CCATATCAGTCCTACACCAATTACTGTTGTAGAGCCTACAATGCGTGACACCCAGGCAG  
ACGTGCCCTCGACCAAAAAGGCTTGGGGCGCAACTTGCGTTCAAAGACTCGATGGTTC  
ACGGGATTCTGCAATTCACACCAAGTATCGCATTTTCGCTACGTTCTTCATCGATGCAAG  
AGCCGAGATATCCGTTGCCGAGAGTCATTCTTTATAATACATATCACGTATTACCCACA  
CAATCTTATGTTAGATAGATGGGAAAACGTTTCATTTATCACAATTCCTTGGCACAATCC  
GTGCCGGGGTGGTTATCTTGGCCACATGGGCCAGTCGAGAGGAGATGGAGCAAATGA  
CACCAAGCCCCCTCAACACATTTGTAAACATGTTTCACAGGTTGTTCTGCTTTGCAGGAT

TCGA

S78-DR:

AATGCGTACTATTATCTTCATCCAAAGGTTTGCAGTACAGATGCAACCAACTCTAATGA  
AATGCCACATGATGACTTAACGAGGGCAAGCCAAGGCAAACCACCGCTCATCATGAAA  
TACATGACATTAATGGTACTCTATTTCAACCAACCNCACTACTATGAGTACGGGAGAG  
CCATATCAGTCCTACACCAATTACTGTTGTAGAGCCTACAATGCGTGACACCCAGGCAG  
ACGTGCCCTCGACCAAAAAGGCTTGGGGCGCAACTTGC GTTCAAAGACTCGATGGTTC  
ACGGGATTCTGCAATTCACACCAAGTATCGCATTTCGCTACGTTCTTCATCGATGCAAG  
AGCCGAGATATCCGTTGCCGAGAGTCATTCTTTATAATACATATCACGTATTACCCACA  
CAATCTTATGTTAGATAGATGGGAAAACGTTTCATTATCACAATTCCTTGGCACAATCC  
GTGCCGGGGTGGTTATCTTGGCCACATGGGCCAGTCGAGAGGAGATGGAGCAAATGA  
CACCAAGCCCCCTCAACACATTTGTAAACATGTTTACAGGTTGTTCTGCTTTGCAGGAT  
TCGA

S79-DT:

AATGCGTACTATTATCTTCATCCAAAGGTTTGCAGTACAGATGCAACCAACTCTAATGA  
CATGCCACATGATGACTTAACGAGGGCAAGCCAAGGCAAACCACCGCTCATCATGAAA  
TACATGACATTAATGGTACTCTATTTCAACCAACCGCACTACTATGAGTACGGGAGAG  
CCATATCAGTCCTACACCAATTACTGTTGTAGAGCCTACAATGCGTGACACCCAGGCAG  
ACGTGCCCTCGACCAAAAAGGCTTGGGGCGCAACTTGC GTTCAAAGACTCGATGGTTC  
ACGGGATTCTGCAATTCACACCAAGTATCGCATTTCGCTACGTTCTTCATCGATGCAAG  
AGCCGAGATATCCGTTGCCGAGAGTCATTCTTTATAATACATATCACGTATTACCCACA  
CAATCTTATGTTAGATAGATGGGAAAACGTTTCATTATCACAATTCCTTGGCACAATCC  
GCGCCGGGGTGGTTATCTTGGCCACATGGGCCAGTCGAGAGGAGATGAAGCAAATGA  
CACCAAGCCCCCTCAACACATTTGTAAACATGTTTACAGGTTGTTCTGCTTTGCAGGAT  
TCGA

S80-DT:

AATGCGTACTATTATCTTCATCCAAAGGTTTGCAGTACAGATGCAACCAACTCTAATGA  
CATGCCACATGATGACTTAACGAGGGCAAGCCAAGGCAAACCACCGCTCATCATGAAA  
TACATGACATTAATGGTACTCTATTTCAACCAACCGCACTACTATGAGTACGGGAGAG  
CCATATCAGTCCTACACCAATTACTGTTGTAGAGCCTACAATGCGTGACACCCAGGCAG  
ACGTGCCCTCGACCAAAAAGGCTTGGGGCGCAACTTGC GTTCAAAGACTCGATGGTTC  
ACGGGATTCTGCAATTCACACCAAGTATCGCATTTCGCTACGTTCTTCATCGATGCAAG  
AGCCGAGATATCCGTTGCCGAGAGTCATTCTTTATAATACATATCACGTATTACCCACA  
CAATCTTATGTTAGATAGATGGGAAAACGTTTCATTATCACAATTCCTTGGCACAATCC  
GCGCCGGGGTGGTTATCTTGGCCACATGGGCCAGTCGAGAGGAGATGAAGCAAATGA  
CACCAAGCCCCCTCAACACATTTGTAAACATGTTTACAGGTTGTTCTGCTTTGCAGGAT  
TCGA

S81-DT:

AATGCGTACTATTATCTTCATCCAAAGGTTTGCAGTACAGATGCAACCAACTCTAATGA  
CATGCCACATGATGACTTAACGAGGGCAAGCCAAGGCAAACCACCGCTCATCATGAAA  
TACATGACATTAATGGTACTCTATTTCAACCAACCGCACTACTATGAGTACGGGAGAG  
CCATATCAGTCCTACACCAATTACTGTTGTAGAGCCTACAATGCGTGACACCCAGGCAG  
ACGTGCCCTCGACCAAAAAGGCTTGGGGCGCAACTTGC GTTCAAAGACTCGATGGTTC  
ACGGGATTCTGCAATTCACACCAAGTATCGCATTTCGCTACGTTCTTCATCGATGCAAG

AGCCGAGATATCCGTTGCCGAGAGTCATTCTTTATAATACATATCACGTATTACCCCACA  
CAATCTTATGTTAGATAGATGGGAAAACGTTTCATTTATCACAATTCCTTGGCACAATCC  
GCGCCGGGGTTGGTTATCTTGGCCACATGGGCCAGTCGAGAGGAGATGAAGCAAATGA  
CACCAAGCCCCCTCAACACATTTGTAAACATGTTTACAGGTTGTTCTGCTTTGCAGGAT  
TCGA

S82-DT:

AATGCGTACTATTATCTTCATCCAAAGGTTTGCAGTACAGATGCAACCAACTCTAATGA  
CATGCCACATGATGACTTAACGAGGGCAAGCCAAGGCAAACCACCGCTCATCATGAAA  
TACATGACATTAATGGTTACTCTATTTCAACCAACCGCACTACTATGAGTACGGGAGAG  
CCATATCAGTCCTACACCAATTACTGTTGTAGAGCCTACAATGCGTGACACCCAGGCAG  
ACGTGCCCTCGACCAAAAAGGCTTGGGGCGCAACTTGCGTTCAAAGACTCGATGGTTC  
ACGGGATTCTGCAATTCACACCAAGTATCGCATTTTCGCTACGTTCTTCATCGATGCAAG  
AGCCGAGATATCCGTTGCCGAGAGTCATTCTTTATAATACATATCACGTATTACCCCACA  
CAATCTTATGTTAGATAGATGGGAAAACGTTTCATTTATCACAATTCCTTGGCACAATCC  
GCGCCGGGGTTGGTTATCTTGGCCACATGGGCCAGTCGAGAGGAGATGAAGCAAATGA  
CACCAAGCCCCCTCAACACATTTGTAAACATGTTTACAGGTTGTTCTGCTTTGCAGGAT  
TCGA

S83-DT:

AATGCGTACTATTATCTTCATCCAAAGGTTTGCAGTACAGATGCAACCAACTCTAATGA  
CATGCCACATGATGACTTAACGAGGGCAAGCCAAGGCAAACCACCGCTCATCATGAAA  
TACATGACATTAATGGTTACTCTATTTCAACCAACCGCACTACTATGAGTACGGGAGAG  
CCATATCAGTCCTACACCAATTACTGTTGTAGAGCCTACAATGCGTGACACCCAGGCAG  
ACGTGCCCTCGACCAAAAAGGCTTGGGGCGCAACTTGCGTTCAAAGACTCGATGGTTC  
ACGGGATTCTGCAATTCACACCAAGTATCGCATTTTCGCTACGTTCTTCATCGATGCAAG  
AGCCGAGATATCCGTTGCCGAGAGTCATTCTTTATAATACATATCACGTATTACCCCACA  
CAATCTTATGTTAGATAGATGGGAAAACGTTTCATTTATCACAATTCCTTGGCACAATCC  
GCGCCGGGGTTGGTTATCTTGGCCACATGGGCCAGTCGAGAGGAGATGAAGCAAATGA  
CACCAAGCCCCCTCAACACATTTGTAAACATGTTTACAGGTTGTTCTGCTTTGCAGGAT  
TCGA

S84-DT:

AATGCGTACTATTATCTTCATCCAAAGGTTTGCAGTACAGATGCAACCAACTCTAATGA  
CATGCCACATGATGACTTAACGAGGGCAAGCCAAGGCAAACCACCGCTCATCATGAAA  
TACATGACATTAATGGTTACTCTATTTCAACCAACCGCACTACTATGAGTACGGGAGAG  
CCATATCAGTCCTACACCAATTACTGTTGTAGAGCCTACAATGCGTGACACCCAGGCAG  
ACGTGCCCTCGACCAAAAAGGCTTGGGGCGCAACTTGCGTTCAAAGACTCGATGGTTC  
ACGGGATTCTGCAATTCACACCAAGTATCGCATTTTCGCTACGTTCTTCATCGATGCAAG  
AGCCGAGATATCCGTTGCCGAGAGTCATTCTTTATAATACATATCACGTATTACCCCACA  
CAATCTTATGTTAGATAGATGGGAAAACGTTTCATTTATCACAATTCCTTGGCACAATCC  
GCGCCGGGGTTGGTTATCTTGGCCACATGGGCCAGTCGAGAGGAGATGNAGCAAATGA  
CACCAAGCCCCCTCAACACATTTGTAAACATGTTTACAGGTTGTTCTGCTTTGCAGGAT  
TCGA

S85-DT:

AATGCGTACTATTATCTTCATCCAAAGGTTTGCAGTACAGATGCAACCAACTCTAATGA  
CATGCCACATGATGACTTAACGAGGGCAAGCCAAGGCAAACCACCGCTCATCATGAAA

TACATGACATTAATGGT TACTCTATTTCAACCAACCGCACTACTATGAGTACGGGAGAG  
CCATATCAGTCCTACACCAATTACTGTTGTAGAGCCTACAATGCGTGACACCCAGGCAG  
ACGTGCCCTCGACCAAAAAGGCTTGGGGCGCAACTTGCGTTCAAAGACTCGATGGTTC  
ACGGGATTCTGCAATTCACACCAAGTATCGCATTTTCGCTACGTTCTTCATCGATGCAAG  
AGCCGAGATATCCGTTGCCGAGAGTCATTCTTTATAATACATATCACGTATTACCCACA  
CAATCTTATGTTAGATAGATGGGAAAACGTTTCATTTATCACAATTCCTTGGCACAATCC  
GCGCCGGGGTTGGTTATCTTGGCCACATGGGCCAGTCGAGAGGAGATGGAGCAAATGA  
CACCAAGCCCCCTCAACACATTTGTAAACATGTTTACAGGTTGTTCTGCTTTGCAGGAT  
TCGA

S86-DT:

AATGCGTACTATTATCTTCATCCAAAGGTTTGCAGTACAGATGCAACCAACTCTAATGA  
CATGCCACATGATGACTTAACGAGGGCAAGCCAAGGCAAACCACCGCTCATCATGAAA  
TACATGACATTAATGGT TACTCTATTTCAACCAACCGCACTACTATGAGTACGGGAGAG  
CCATATCAGTCCTACACCAATTACTGTTGTAGAGCCTACAATGCGTGACACCCAGGCAG  
ACGTGCCCTCGACCAAAAAGGCTTGGGGCGCAACTTGCGTTCAAAGACTCGATGGTTC  
ACGGGATTCTGCAATTCACACCAAGTATCGCATTTTCGCTACGTTCTTCATCGATGCAAG  
AGCCGAGATATCCGTTGCCGAGAGTCATTCTTTATAATACATATCACGTATTACCCACA  
CAATCTTATGTTAGATAGATGGGAAAACGTTTCATTTATCACAATTCCTTGGCACAATCC  
GCGCCGGGGTTGGTTATCTTGGCCACATGGGCCAGTCGAGAGGAGATGGAGCAAATGA  
CACCAAGCCCCCTCAACACATTTGTAAACATGTTTACAGGTTGTTCTGCTTTGCAGGAT  
TCGA

S87-DT:

AATGCGTACTATTATCTTCATCCAAAGGTTTGCAGTACAGATGCAACCAACTCTAATGA  
CATGCCACATGATGACTTAACGAGGGCAAGCCAAGGCAAACCACCGCTCATCATGAAA  
TACATGACATTAATGGT TACTCTATTTCAACCAACCGCACTACTATGAGTACGGGAGAG  
CCATATCAGTCCTACACCAATTACTGTTGTAGAGCCTACAATGCGTGACACCCAGGCAG  
ACGTGCCCTCGACCAAAAAGGCTTGGGGCGCAACTTGCGTTCAAAGACTCGATGGTTC  
ACGGGATTCTGCAATTCACACCAAGTATCGCATTTTCGCTACGTTCTTCATCGATGCAAG  
AGCCGAGATATCCGTTGCCGAGAGTCATTCTTTATAATACATATCACGTATTACCCACA  
CAATCTTATGTTAGATAGATGGGAAAACGTTTCATTTATCACAATTCCTTGGCACAATCC  
GCGCCGGGGTTGGTTATCTTGGCCACATGGGCCAGTCGAGAGGAGATGAAGCAAATGA  
CACCAAGCCCCCTCAACACATTTGTAAACATGTTTACAAGTTGTTCTGCTTTGCAGGAT  
TCGA

S88-DT:

AATGCGTACTATTATCTTCATCCAAAGGTTTGCAGTACAGATGCAACCAACTCTAATGA  
CATGCCACATGATGACTTAACGAGGGCAAGCCAAGGCAAACCACCGCTCATCATGAAA  
TACATGACATTAATGGT TACTCTATTTCAACCAACCGCACTACTATGAGTACGGGAGAG  
CCATATCAGTCCTACACCAATTACTGTTGTAGAGCCTACAATGCGTGACACCCAGGCAG  
ACGTGCCCTCGACCAAAAAGGCTTGGGGCGCAACTTGCGTTCAAAGACTCGATGGTTC  
ACGGGATTCTGCAATTCACACCAAGTATCGCATTTTCGCTACGTTCTTCATCGATGCAAG  
AGCCGAGATATCCGTTGCCGAGAGTCATTCTTTATAATACATATCACGTATTACCCACA  
CAATCTTATGTTAGATAGATGGGAAAACGTTTCATTTATCACAATTCCTTGGCACAATCC  
GCGCCGGGGTTGGTTATCTTGGCCACATGGGCCAGTCGAGAGGAGATGAAGCAAATGA  
CACCAAGCCCCCTCAACACATTTGTAAACATGTTTACAAGTTGTTCTGCTTTGCAGGAT



TCGA

S89-DT:

AATGCGTACTATTATCTTCATCCAAAGGTTTGCAGTACAGATGCAACCAACTCTAATGA  
CATGCCACATGATGACTTAACGAGGGCAAGCCAAGGCAAACCACCGCTCATCATGAAA  
TACATGACATTAATGGTACTCTATTTCAACCAACCGCACTACTATGAGTACGGGAGAG  
CCATATCAGTCCTACACCAATTACTGTTGTAGAGCCTACAATGCGTGACACCCAGGCAG  
ACGTGCCCTCGACCAAAAAGGCTTGGGGCGCAACTTGC GTTCAAAGACTCGATGGTTC  
ACGGGATTCTGCAATTCACACCAAGTATCGCATTTCGCTACGTTCTTCATCGATGCAAG  
AGCCGAGATATCCGTTGCCGAGAGTCATTCTTTATAATACATATCACGTATTACCCACA  
CAATCTTATGTTAGATAGATGGGAAAACGTTTCATTTATCACAATTCCTTGGCACAATCC  
GCGCCGGGGTGGTTATCTTGGCCACATGGGCCAGTCGAGAGGAGATGAAGCAAATGA  
CACCAAGCCCCCTCAACACATTTGTAAACATGTTTACAAGTTGTTCTGCTTTGCAGGAT  
TCGA

S90-DT:

AATGCGTACTATTATCTTCATCCAAAGGTTTGCAGTACAGATGCAACCAACTCTAATGA  
CATGCCACATGATGACTTAACGAGGGCAAGCCAAGGCAAACCACCGCTCATCATGAAA  
TACATGACATTAATGGTACTCTATTTCAACCAACCGCACTACTATGAGTACGGGAGAG  
CCATATCAGTCCTACACCAATTACTGTTGTAGAGCCTACAATGCGTGACACCCAGGCAG  
ACGTGCCCTCGACCAAAAAGGCTTGGGGCGCAACTTGC GTTCAAAGACTCGATGGTTC  
ACGGGATTCTGCAATTCACACCAAGTATCGCATTTCGCTACGTTCTTCATCGATGCAAG  
AGCCGAGATATCCGTTGCCGAGAGTCATTCTTTATAATACATATCACGTATTACCCACA  
CAATCTTATGTTAGATAGATGGGAAAACGTTTCATTTATCACAATTCCTTGGCACAATCC  
GCGCCGGGGTGGTTATCTTGGCCACATGGGCCAGTCGAGAGGAGATGGAGCAAATGA  
CACCAAGCCCCCTCAACACATTTGTAAACATGTTTACAAGTTGTTCTGCTTTGCAGGAT  
TCGA

S91-DT:

AATGCGTACTATTATCTTCATCCAAAGGTTTGCAGTACAGATGCAACCAACTCTAATGA  
CATGCCACATGATGACTTAACGAGGGCAAGCCAAGGCAAACCACCGCTCATCATGAAA  
TACATGACATTAATGGTACTCTATTTCAACCAACCGCACTACTATGAGTACGGGAGAG  
CCATATCAGTCCTACACCAATTACTGTTGTAGAGCCTACAATGCGTGACACCCAGGCAG  
ACGTGCCCTCGACCAAAAAGGCTTGGGGCGCAACTTGC GTTCAAAGACTCGATGGTTC  
ACGGGATTCTGCAATTCACACCAAGTATCGCATTTCGCTACGTTCTTCATCGATGCAAG  
AGCCGAGATATCCGTTGCCGAGAGTCATTCTTTATAATACATATCACGTATTACCCACA  
CAATCTTATGTTAGATAGATGGGAAAACGTTTCATTTATCACAATTCCTTGGCACAATCC  
GCGCCGGGGTGGTTATCTTGGCCACATGGGCCAGTCGAGAGGAGATGGAGCAAATGA  
CACCAAGCCCCCTCAACACATTTGTAAACATGTTTACAAGTTGTTCTGCTTTGCAGGAT  
TCGA

S92-DT:

AATGCGTACTATTATCTTCATCCAAAGGTTTGCAGTACAGATGCAACCAACTCTAATGA  
CATGCCACATGATGACTTAACGAGGGCAAGCCAAGGCAAACCACCGCTCATCATGAAA  
TACATGACATTAATGGTACTCTATTTCAACCAACCGCACTACTATGAGTACGGGAGAG  
CCATATCAGTCCTACACCAATTACTGTTGTAGAGCCTACAATGCGTGACACCCAGGCAG  
ACGTGCCCTCGACCAAAAAGGCTTGGGGCGCAACTTGC GTTCAAAGACTCGATGGTTC  
ACGGGATTCTGCAATTCACACCAAGTATCGCATTTCGCTACGTTCTTCATCGATGCAAG

AGCCGAGATATCCGTTGCCGAGAGTCATTCTTTATAATACATATCACGTATTACCCACA  
CAATCTTATGTTAGATAGATGGGAAAACGTTTCATTTATCACAATTCCTTGGCACAATCC  
GCGCCGGGGTTGGTTATCTTGGCCACATGGGCCAGTCGAGAGGAGATGGAGCAAATGA  
CACCAAGCCCCCTCAACACATTTGTAAACATGTTTCACAGGTTGTTCTGCTTTGCAGGAT  
TCGA

S93-DT:

AATGCGTACTATTATCTTCATCCAAAGGTTTGCAGTACAGATGCAACCAACTCTAATGA  
CATGCCACATGATGACTTAACGAGGGCAAGCCAAGGCAAACCACCGCTCATCATGAAA  
TACATGACATTAATGGTTACTCTATTTCAACCAACCGCACTACTATGAGTACGGGAGAG  
CCATATCAGTCCTACACCAATTACTGTTGTAGAGCCTACAATGCGTGACACCCAGGCAG  
ACGTGCCCTCGACCAAAGGCTTGGGGCGCAACTTGC GTTCAAAGACTCGATGGTTC  
ACGGGATTCTGCAATTCACACCAAGTATCGCATTTTCGCTACGTTCTTCATCGATGCAAG  
AGCCGAGATATCCGTTGCCGAGAGTCATTCTTTATAATACATATCACGTATTACCCACA  
CAATCTTATGTTAGATAGATGGGAAAACGTTTCATTTATCACAATTCCTTGGCACAATCC  
GCGCCGGGGTTGGTTATCTTGGCCACATGGGCCAGTCGAGAGGAGATGNAGCAAATGA  
CACCAAGCCCCCTCAACACATTTGTAAACATGTTTCACAGGTTGTTCTGCTTTGCAGGAT  
TCGA

*Thymelaea aucheri*-AJ549445.1

GATGCGTGCTATCTTCATCCAAAAGTCTGAAGTAGAGAAGCAACCAACTCTAGTGATG  
TGCTGCACACGATGACTTAACGAGGGCAAGCCAAGACAAACCACCGCTCATCGTGCC  
ATACACCACATTAAGGTTACTCTATTTGGGCCAACCGCACTACTGTGAGTACGGGAGAG  
CCAATATCAGCCCACACA ACTATTGTAAAGGCTACGATGCGTGACACCCAGGCAGACG  
TGCCCTCGGCCCGAAGGCTTGGGGCGCAACTTGC GTTCAAAGACTCGATGGTTCACGG  
GATTCTGCAATTCACACCAAGTATCGCATTTTCGCTACGTTCTTCATCGATGCGAGAGCC  
GAGATATCCGTTGCCGAGAGTCGTTCTGTGTAATACATATCACGCATTACCCACACAAT  
CTTGTGTTAAGATGTATGGGGTAAAAACGTTTCATTTGTCACAATTCCTTGGCGCATT  
CACGCCGGGGTTGGTTATCTTGGCCACATGGGCCAGTCAAGTGAAAATGGAGCCAATG  
GCTACATTCCCCCTTAACACATTTACTAACATGTTTCACGGGTTGTTCTGCTTTGCAGGAT  
TCGA

*Thymelaea dioica*-AJ549468.1

GATGCGCACTGTCTTCGTTTCGAAAGTCTGAAGTACAAAAGCAACCAACTTTAGTGATG  
TGCTGCACACGATGACTTAACGAGGGCAAGCCAAGACAAACCACCGCTCATCGTGCC  
ATACACCACATTAGGGTTACTCTATTTGGGCCAACCGTACTACTATGAGTATGGGAGAG  
CCAATATCAGCACCACACCAACAGCTGTTGTATGGGCTACGATGCGTGACACCCAGGC  
AGACGTGCCCTCGGCCCGAAGGCTTGGGGCGCAACTTGC GTTCAAAGACTCGATGGT  
TCACGGGATTCTGCAATTCACACCAAGTATCGCATTTTCGCTACGTTCTTCATCGATGCG  
AGAGCCGAGATATCCGTTGCCGAGAGTCGTTCTTTATAATACATATCACGCATTACCCCA  
CACAATCTGTGTTGGATGCATGAGGAAAATGCTTTATTTATCACAATTCCTTGGCGCAA  
TCCGCGCCGGGGTTGGTTATCTTGGCCACATGGGCCAGTCAAGAAGAAATGGAGCCAA  
AGGCTGCATTCCCCCTCAACACATTTGCTAACATGTTTCACAGGTTGTTCTGCTTTGCAG  
GATTCGA

*Daphne blagayana* isolate DB45\_SL-GQ167491.1

AGCGGGTATTCCCGCCTGACCTGGGGTCGCAATGCGTACTATCTTCAACCAAAGGTTTG  
AAGTACAATGCAACCAACTCTAATGACATGCTATACACGATGACTTAACGAGGGCAAG

CGAAGACAAACCACCGCTCATCATGAAATACATGACATTAAGGTTACTCAATTTCAAC  
CAACCGCACTACTATGAGGACGGGAGAGCCATTCTCAGCCCTACACAGACTAATCTTGT  
AGAGGCTACAATGCGTGACACCCAGGCAGACGTGCCCTCGGCCCGAAGGCTTGGGGC  
GCAACTTGCCTCAAAGACTCGATGGTTCACGGGATTCTGCAATTCACACCAAGTATC  
GCATTTGCTACGTTCTTCATCGATGCGAGAGCCGAGATATCCGTTGCCGAGAGTCATT  
CTTTATAATACATATCACGCATTACCCCATACAATCTAATGTTAGATGCATGGGGAAATCG  
TTTCATTTTTCAAATTCCTTGGCACAATCCGCGCCGGGGTTGGTTATCTTGGCCACATG  
AGCCAGTTGAGAGGAGATGGAGCCAATGACACCAAGCCCCCTCAACACATTTGCAAA

*Daphne cneorum*-AJ549490.1

AATGCGTAATATTATCTTCATCCAAAGGTTTGAAGTACAAATGCAACCAACACCAATGA  
CATGCTATACACGATGACTTAACGAAGGCAAGCCAAGACAAACCACCGCTCATCATGA  
AATACATGACATTAATGGTTACCCTATTTAGCCAACCGCACTACTATGAGGACGGGAG  
AGCCATATCAGCCCTACACCCACAAATTTGTAGAGGCTACAATGCGTGACACCCAGG  
CAGACGTGCCCTCAACCCGAAGGCTTGGGGCGCAACTTTCGTTCAAAGACTCGATGG  
TTCACGGGATTCTGCAATTCACACCAAGTATCGCATTTGCTACGTTCTTCATCGATGCA  
AGAGCCGAGATATCCGTTGCCGAGAGTCATTCTTTATAATATACATATCACGCATTACCA  
CACACAATCTTATGTTAGATGGCATGGGGAAAACGTTTCATTTATCACAATTCCTTGGCA  
CAATCCGTGCCGGGGTTGGTTATCTTGGCCACATGGGCCAGTCAAGAGGAGATGGAGC  
CAATGACGCCAAAGCCCCCTCAACACATTTGAAAACATGTTTACAAGTTGTTTTGCT  
TTGCAGGATTCGA
