# Supplementary material for: Identification of three Daphne species by DNA barcoding and HPLC fingerprint analysis
Source: PubMed Central journal article supplement (PMC6072044; doi:10.1371/journal.pone.0201711), 2018-08-02
Supplement: pone.0201711.s003.pdf [file pone.0201711.s003.pdf]

## S3 File. Results of HCA and PCA of Cortex Daphnes samples

|     | 1        | 2        | 3        | 4        | 5 | 6        | 7        | 8        |
|-----|----------|----------|----------|----------|---|----------|----------|----------|
| S1  | 0.187716 | 0.053503 | 1.345998 | 0.052341 | 1 | 0        | 0.151783 | 0.019595 |
| S2  | 0.18442  | 0.072252 | 1.269893 | 0.050212 | 1 | 0        | 0.162563 | 0.016417 |
| S3  | 0.180246 | 0.04221  | 1.071071 | 0.048657 | 1 | 0        | 0.155054 | 0.022287 |
| S4  | 0.172507 | 0.045406 | 1.155301 | 0.052668 | 1 | 0        | 0.156586 | 0.000001 |
| S5  | 0.000001 | 0.071355 | 1.322275 | 0.048961 | 1 | 0        | 0.157468 | 0.022353 |
| S6  | 0.170837 | 0.07811  | 1.890428 | 0.058392 | 1 | 0        | 0.163757 | 0.011997 |
| S7  | 0.179226 | 0.039599 | 1.901266 | 0.064138 | 1 | 0        | 0.182314 | 0.020951 |
| S8  | 0.193165 | 0.069402 | 1.665088 | 0.059303 | 1 | 0        | 0.168761 | 0.010694 |
| S9  | 0.16021  | 0.050492 | 0.000001 | 0.04105  | 1 | 0        | 0.204238 | 0.011541 |
| S10 | 0.19755  | 0.069567 | 1.500762 | 0.053873 | 1 | 0        | 0.213719 | 0.010783 |
| S11 | 0.117702 | 0.055881 | 2.45476  | 0.048888 | 1 | 0        | 0.161133 | 0.01438  |
| S12 | 0.108642 | 0.078742 | 2.218569 | 0.057771 | 1 | 0        | 0.171871 | 0.011232 |
| S13 | 0.123813 | 0.05434  | 1.518283 | 0.053802 | 1 | 0        | 0.200263 | 0.010945 |
| S14 | 0.154104 | 0.062137 | 2.361631 | 0.053054 | 1 | 0        | 0.18299  | 0.014777 |
| S15 | 0.141147 | 0.062379 | 0.947921 | 0.036815 | 1 | 0        | 0.163338 | 0.000001 |
| S16 | 0.152735 | 0.037749 | 1.895825 | 0.035512 | 1 | 0        | 0.157567 | 0.015889 |
| S17 | 0.167651 | 0.028709 | 1.064802 | 0.035605 | 1 | 0        | 0.185502 | 0.024482 |
| S18 | 0.191315 | 0.071748 | 1.33116  | 0.047022 | 1 | 0        | 0.329292 | 0.011184 |
| S19 | 0.169589 | 0.064303 | 1.1913   | 0.044783 | 1 | 0        | 0.176287 | 0.020804 |
| S20 | 0.216587 | 0.058955 | 1.347842 | 0.0391   | 1 | 0        | 0.206953 | 0.016456 |
| S21 | 0.238464 | 0.059855 | 1.252369 | 0.076207 | 1 | 0        | 0.284149 | 0.027341 |
| S22 | 0.190263 | 0.054242 | 1.274198 | 0.0694   | 1 | 0        | 0.354975 | 0.023501 |
| S23 | 0.210515 | 0.069296 | 1.278222 | 0.052746 | 1 | 0        | 0.316624 | 0.029121 |
| S24 | 0.210515 | 0.068296 | 1.268222 | 0.042746 | 1 | 0        | 0.416624 | 0.026121 |
| S25 | 0.192162 | 0.203598 | 1.748244 | 0.05352  | 1 | 0.02015  | 0.133465 | 0.074919 |
| S26 | 0.215557 | 0.193479 | 1.777034 | 0.073197 | 1 | 0.019266 | 0.301609 | 0.000001 |
| S27 | 0.00001  | 0.215608 | 1.715421 | 0.064787 | 1 | 0.019886 | 0.209079 | 0.080522 |
| S28 | 0.201266 | 0.184301 | 1.674433 | 0.070845 | 1 | 0.020604 | 0.145575 | 0.071243 |
| S29 | 0.262932 | 0.000001 | 1.606454 | 0.052799 | 1 | 0.02401  | 0.480926 | 0.065901 |
| S30 | 0.20232  | 0.208942 | 1.753198 | 0.028995 | 1 | 0.021163 | 0.499495 | 0.064569 |
| S31 | 0.208308 | 0.195492 | 1.175852 | 0.080326 | 1 | 0.020193 | 0.509971 | 0.065187 |
| S32 | 0.000001 | 0.190232 | 1.604611 | 0.044301 | 1 | 0        | 0.608253 | 0.081081 |
| S33 | 0.21648  | 0.207284 | 0.000011 | 0.034953 | 1 | 0.022245 | 0.493381 | 0.054157 |
| S34 | 0.226202 | 0.184564 | 1.74822  | 0.036209 | 1 | 0.023826 | 0.000001 | 0.065788 |
| S35 | 0.222062 | 0.178812 | 1.667506 | 0.039399 | 1 | 0.023552 | 0.217449 | 0.072021 |
| S36 | 0.221398 | 0.213564 | 1.815235 | 0.062685 | 1 | 0        | 0.395669 | 0.050394 |
| S37 | 0.000001 | 0.213729 | 1.704676 | 0.000001 | 1 | 0.021288 | 0.572874 | 0.069577 |
| S38 | 0.236565 | 0.229977 | 1.806167 | 0.047013 | 1 | 0.021438 | 0.474856 | 0.06586  |
| S39 | 0.166504 | 0.114069 | 1.316991 | 0.108989 | 1 | 0        | 0.000001 | 0.01757  |
| S40 | 0.120405 | 0.104518 | 0.000001 | 0.101269 | 1 | 0        | 0.162491 | 0.015937 |
| S41 | 0.000001 | 0.098463 | 1.090637 | 0.10011  | 1 | 0        | 0.193164 | 0.014153 |
| S42 | 0.10286  | 0.105799 | 1.052149 | 0.099288 | 1 | 0        | 0.180306 | 0.015525 |
| S43 | 0.130113 | 0.000001 | 1.367849 | 0.110691 | 1 | 0        | 0.121228 | 0.022765 |
| S44 | 0.214128 | 0.141038 | 1.311627 | 0.132197 | 1 | 0        | 0.184009 | 0.015547 |
| S45 | 0.196633 | 0.173378 | 1.978535 | 0.000001 | 1 | 0        | 0.201759 | 0.018873 |
| S46 | 0.149467 | 0.142974 | 1.455467 | 0.109967 | 1 | 0        | 0.164284 | 0.016651 |
| S47 | 0.082856 | 0.1444   | 1.150117 | 0.076323 | 1 | 0        | 0.157917 | 0.00893  |
| S48 | 0.000001 | 0.122151 | 1.083127 | 0.041083 | 1 | 0        | 0.102147 | 0.000001 |
| S49 | 0.102512 | 0.14082  | 1.188597 | 0.111804 | 1 | 0        | 0.175523 | 0.013757 |

|     |          |          |          |          |   |   |          |          |
|-----|----------|----------|----------|----------|---|---|----------|----------|
| S50 | 0.096002 | 0.138576 | 1.1821   | 0.125137 | 1 | 0 | 0.337085 | 0.023547 |
| S51 | 0.125506 | 0.148798 | 1.248169 | 0.109085 | 1 | 0 | 0.206832 | 0.011858 |
| S52 | 0.149247 | 0.177933 | 1.513163 | 0.128582 | 1 | 0 | 0.130946 | 0.009354 |
| S53 | 0.152429 | 0.155931 | 1.422934 | 0.084192 | 1 | 0 | 0.253435 | 0.014188 |
| S54 | 0.166034 | 0.147521 | 1.404775 | 0.092917 | 1 | 0 | 0.000001 | 0.016038 |
| S55 | 0.158518 | 0.141643 | 0.000001 | 0.126819 | 1 | 0 | 0.188334 | 0.013793 |
| S56 | 0.153834 | 0.132741 | 1.131413 | 0.101996 | 1 | 0 | 0.286008 | 0.019999 |
| S57 | 0.156186 | 0.156876 | 1.402784 | 0.098543 | 1 | 0 | 0.239138 | 0.016646 |
| S58 | 0.254862 | 0.166854 | 2.77247  | 0.059756 | 1 | 0 | 0.262456 | 0.023608 |
| S59 | 0.249321 | 0.182135 | 2.999996 | 0.063008 | 1 | 0 | 0.29822  | 0.022227 |
| S60 | 0.34243  | 0.179188 | 2.962896 | 0.054366 | 1 | 0 | 0.399717 | 0.028117 |
| S61 | 0.210691 | 0.216179 | 2.986938 | 0.041784 | 1 | 0 | 0.295812 | 0.026074 |
| S62 | 0.423252 | 0.223322 | 2.703597 | 0.052173 | 1 | 0 | 0.305782 | 0.02732  |
| S63 | 0.244347 | 0.175718 | 2.902419 | 0.06569  | 1 | 0 | 0.314882 | 0.02763  |
| S64 | 0.211908 | 0.166816 | 2.846941 | 0.061288 | 1 | 0 | 0.257381 | 0.026838 |
| S65 | 0.34243  | 0.179188 | 2.962896 | 0.054366 | 1 | 0 | 0.269972 | 0.028117 |
| S66 | 0.12073  | 0.086576 | 1.13205  | 0.174249 | 1 | 0 | 0.104997 | 0.013884 |
| S67 | 0.083552 | 0.070177 | 1.08451  | 0.087693 | 1 | 0 | 0.108681 | 0.012323 |
| S68 | 0.07355  | 0.077269 | 0.932348 | 0.082415 | 1 | 0 | 0.117593 | 0.012871 |
| S69 | 0.170267 | 0.073063 | 1.371039 | 0.051673 | 1 | 0 | 0.147451 | 0.014375 |
| S70 | 0.055225 | 0.257434 | 0.807893 | 0.120794 | 1 | 0 | 0.101812 | 0.025435 |
| S71 | 0.037322 | 0.232717 | 0.803859 | 0.180487 | 1 | 0 | 0.093927 | 0.012485 |
| S72 | 0.024995 | 0.188101 | 0.61394  | 0.108681 | 1 | 0 | 0.161345 | 0.012966 |
| S73 | 0.058659 | 0.262382 | 0.882955 | 0.167702 | 1 | 0 | 0.095001 | 0.013368 |
| S74 | 0.052786 | 0.244603 | 0.759842 | 0.116456 | 1 | 0 | 0.116962 | 0.017587 |
| S75 | 0.16809  | 0.088518 | 1.470186 | 0.057509 | 1 | 0 | 0.138139 | 0.015724 |
| S76 | 0.128968 | 0.078438 | 1.364155 | 0.045709 | 1 | 0 | 0.122216 | 0.014212 |
| S77 | 0.068021 | 0.135546 | 0.70981  | 0.072218 | 1 | 0 | 0.089998 | 0.020981 |
| S78 | 0.149382 | 0.139345 | 1.664049 | 0.124075 | 1 | 0 | 0.17549  | 0.014262 |
| S79 | 0.055225 | 0.257434 | 0.807893 | 0.120794 | 1 | 0 | 0.101812 | 0.025435 |
| S80 | 0.037322 | 0.232717 | 0.803859 | 0.180487 | 1 | 0 | 0.093927 | 0.012485 |
| S81 | 0.024995 | 0.188101 | 0.61394  | 0.108681 | 1 | 0 | 0.161345 | 0.012966 |
| S82 | 0.058659 | 0.262382 | 0.882955 | 0.167702 | 1 | 0 | 0.095001 | 0.013368 |
| S83 | 0.052786 | 0.244603 | 0.759842 | 0.116456 | 1 | 0 | 0.116962 | 0.017587 |
| S84 | 0.320915 | 0.300913 | 1.694436 | 0.066231 | 1 | 0 | 0.0902   | 0.019209 |
| S85 | 0.300915 | 0.330091 | 1.769444 | 0.066231 | 1 | 0 | 0.0942   | 0.020209 |
| S86 | 0.310915 | 0.303009 | 1.739444 | 0.000001 | 1 | 0 | 0.0932   | 0.020921 |
| S87 | 0.321111 | 0.31815  | 1.781515 | 0.069569 | 1 | 0 | 0.112    | 0.017004 |
| S88 | 0.341111 | 0.29815  | 1.845152 | 0.068826 | 1 | 0 | 0.11     | 0.022004 |
| S89 | 0.331111 | 0.32815  | 1.815152 | 0.069763 | 1 | 0 | 0.099998 | 0.021004 |
| S90 | 0.343109 | 0.362918 | 2.19233  | 0.059273 | 1 | 0 | 0.079993 | 0.036561 |
| S91 | 0.32611  | 0.303494 | 1.852057 | 0.000001 | 1 | 0 | 0.085014 | 0.024926 |
| S92 | 0.32711  | 0.343494 | 1.952057 | 0.055116 | 1 | 0 | 0.084501 | 0.034926 |
| S93 | 0.32     | 0.222857 | 1.97     | 0.051429 | 1 | 0 | 0.085714 | 0.021429 |

| 9        | 10 | 11       | 12       | 13 | 14       | 15       | 16       | 17       |
|----------|----|----------|----------|----|----------|----------|----------|----------|
| 0        | 0  | 0.008604 | 0.019838 | 0  | 0        | 0        | 0.009479 | 0        |
| 0        | 0  | 0.008946 | 0        | 0  | 0        | 0        | 0.008603 | 0        |
| 0        | 0  | 0.009425 | 0.021796 | 0  | 0        | 0        | 0.008789 | 0        |
| 0        | 0  | 0.00813  | 0.021159 | 0  | 0        | 0        | 0.008158 | 0        |
| 0        | 0  | 0.000001 | 0.021201 | 0  | 0        | 0        | 0        | 0        |
| 0        | 0  | 0.009497 | 0.014854 | 0  | 0        | 0        | 0.00957  | 0        |
| 0        | 0  | 0.009142 | 0.023649 | 0  | 0        | 0        | 0.006942 | 0        |
| 0        | 0  | 0.009837 | 0.025892 | 0  | 0        | 0        | 0.008679 | 0        |
| 0        | 0  | 0.008548 | 0.023029 | 0  | 0        | 0        | 0.005284 | 0        |
| 0        | 0  | 0.008165 | 0.022115 | 0  | 0        | 0        | 0.007379 | 0        |
| 0        | 0  | 0.008393 | 0.023369 | 0  | 0        | 0        | 0        | 0        |
| 0        | 0  | 0.00844  | 0.021295 | 0  | 0        | 0        | 0.009128 | 0        |
| 0        | 0  | 0.006793 | 0        | 0  | 0        | 0        | 0.007155 | 0        |
| 0        | 0  | 0.006327 | 0.01158  | 0  | 0        | 0        | 0.007093 | 0        |
| 0        | 0  | 0.007837 | 0        | 0  | 0        | 0        | 0.008433 | 0        |
| 0        | 0  | 0.00247  | 0.014151 | 0  | 0        | 0        | 0.009569 | 0        |
| 0        | 0  | 0.002323 | 0.022024 | 0  | 0        | 0        | 0.009091 | 0        |
| 0.157939 | 0  | 0.038129 | 0.007384 | 0  | 0        | 0.10664  | 0        | 0.065702 |
| 0.135025 | 0  | 0.015715 | 0.006033 | 0  | 0        | 0.077002 | 0        | 0.054893 |
| 0.153122 | 0  | 0.017941 | 0.008509 | 0  | 0        | 0.089708 | 0        | 0.053013 |
| 0.15936  | 0  | 0.0302   | 0.005028 | 0  | 0        | 0.051809 | 0        | 0.029091 |
| 0.190452 | 0  | 0.039695 | 0.004993 | 0  | 0        | 0.0739   | 0        | 0.041327 |
| 0.14115  | 0  | 0.031915 | 0.006431 | 0  | 0        | 0.041854 | 0        | 0.042888 |
| 0.15115  | 0  | 0.032192 | 0.007431 | 0  | 0        | 0.041854 | 0        | 0.042888 |
| 0        | 0  | 0.02062  | 0.00979  | 0  | 0.074572 | 0        | 0        | 0        |
| 0        | 0  | 0.000001 | 0.010294 | 0  | 0.063585 | 0        | 0        | 0        |
| 0        | 0  | 0.047624 | 0.007055 | 0  | 0.06581  | 0        | 0        | 0        |
| 0        | 0  | 0.024988 | 0.007109 | 0  | 0.06648  | 0        | 0        | 0        |
| 0        | 0  | 0.031435 | 0        | 0  | 0.078395 | 0        | 0        | 0        |
| 0        | 0  | 0.084609 | 0.008086 | 0  | 0.053599 | 0        | 0        | 0        |
| 0        | 0  | 0.045011 | 0.009176 | 0  | 0.069443 | 0        | 0        | 0        |
| 0        | 0  | 0.05106  | 0.010338 | 0  | 0.059443 | 0        | 0        | 0        |
| 0        | 0  | 0.000001 | 0.01149  | 0  | 0.048742 | 0        | 0        | 0        |
| 0        | 0  | 0.063145 | 0.009757 | 0  | 0.061591 | 0        | 0        | 0        |
| 0        | 0  | 0.062755 | 0.007807 | 0  | 0.060645 | 0        | 0        | 0        |
| 0        | 0  | 0.056551 | 0.010311 | 0  | 0.070532 | 0        | 0        | 0        |
| 0        | 0  | 0.000001 | 0.008465 | 0  | 0.053599 | 0        | 0        | 0        |
| 0        | 0  | 0.068131 | 0.010449 | 0  | 0.06443  | 0        | 0        | 0        |
| 0        | 0  | 0.010903 | 0.006523 | 0  | 0.074572 | 0        | 0        | 0        |
| 0        | 0  | 0.010264 | 0.004477 | 0  | 0.063585 | 0        | 0        | 0        |
| 0        | 0  | 0.009799 | 0.004645 | 0  | 0.06581  | 0        | 0        | 0        |
| 0        | 0  | 0.010632 | 0.004136 | 0  | 0.06648  | 0        | 0        | 0        |
| 0        | 0  | 0.008702 | 0        | 0  | 0.078395 | 0        | 0        | 0        |
| 0        | 0  | 0.013091 | 0.006231 | 0  | 0.053599 | 0        | 0        | 0        |
| 0        | 0  | 0.015615 | 0.008565 | 0  | 0.009443 | 0        | 0        | 0        |
| 0        | 0  | 0.011626 | 0.005467 | 0  | 0.038742 | 0        | 0        | 0        |
| 0        | 0  | 0.000001 | 0.003287 | 0  | 0.061591 | 0        | 0        | 0        |
| 0        | 0  | 0.008049 | 0.003978 | 0  | 0.060645 | 0        | 0        | 0        |
| 0        | 0  | 0.021369 | 0.005331 | 0  | 0.070532 | 0        | 0        | 0        |

|   |          |          |          |          |          |   |   |   |
|---|----------|----------|----------|----------|----------|---|---|---|
| 0 | 0        | 0.036814 | 0.004625 | 0        | 0.080724 | 0 | 0 | 0 |
| 0 | 0        | 0.027661 | 0.005324 | 0        | 0.090796 | 0 | 0 | 0 |
| 0 | 0        | 0.015346 | 0.006265 | 0        | 0.097316 | 0 | 0 | 0 |
| 0 | 0        | 0.028615 | 0.008229 | 0        | 0.038742 | 0 | 0 | 0 |
| 0 | 0        | 0.022824 | 0.003345 | 0        | 0.061591 | 0 | 0 | 0 |
| 0 | 0        | 0.020579 | 0.004262 | 0        | 0        | 0 | 0 | 0 |
| 0 | 0        | 0.029689 | 0.00405  | 0        | 0.070532 | 0 | 0 | 0 |
| 0 | 0        | 0.029652 | 0.006515 | 0        | 0.080724 | 0 | 0 | 0 |
| 0 | 0.08498  | 0.043478 | 0.003733 | 0        | 0        | 0 | 0 | 0 |
| 0 | 0.0428   | 0.013116 | 0.00502  | 0        | 0        | 0 | 0 | 0 |
| 0 | 0.04809  | 0.073794 | 0.00556  | 0        | 0        | 0 | 0 | 0 |
| 0 | 0.037322 | 0.074859 | 0.003801 | 0        | 0        | 0 | 0 | 0 |
| 0 | 0.024995 | 0.067509 | 0.004112 | 0        | 0        | 0 | 0 | 0 |
| 0 | 0.022824 | 0.062062 | 0.004617 | 0        | 0        | 0 | 0 | 0 |
| 0 | 0.093546 | 0.052091 | 0.00665  | 0        | 0        | 0 | 0 | 0 |
| 0 | 0.0137   | 0.073794 | 0.00556  | 0        | 0        | 0 | 0 | 0 |
| 0 | 0        | 0.007051 | 0.001882 | 0.008046 | 0.012334 | 0 | 0 | 0 |
| 0 | 0        | 0.008135 | 0.002076 | 0.010337 | 0.004698 | 0 | 0 | 0 |
| 0 | 0        | 0.012334 | 0.001625 | 0.018819 | 0.041311 | 0 | 0 | 0 |
| 0 | 0        | 0.004698 | 0.003989 | 0.023301 | 0.021935 | 0 | 0 | 0 |
| 0 | 0        | 0.041311 | 0.001962 | 0.001651 | 0.030085 | 0 | 0 | 0 |
| 0 | 0        | 0.021935 | 0.001532 | 0.001955 | 0.017324 | 0 | 0 | 0 |
| 0 | 0        | 0.030085 | 0.000715 | 0.000946 | 0.015128 | 0 | 0 | 0 |
| 0 | 0        | 0.017324 | 0.002374 | 0.003761 | 0.045028 | 0 | 0 | 0 |
| 0 | 0        | 0.031642 | 0.001754 | 0.002355 | 0.022098 | 0 | 0 | 0 |
| 0 | 0        | 0.010971 | 0.003921 | 0.023301 | 0.01266  | 0 | 0 | 0 |
| 0 | 0        | 0.009588 | 0.003902 | 0.001651 | 0.011964 | 0 | 0 | 0 |
| 0 | 0        | 0.014184 | 0.002706 | 0.001955 | 0.012474 | 0 | 0 | 0 |
| 0 | 0        | 0.029351 | 0.003112 | 0.000946 | 0.008135 | 0 | 0 | 0 |
| 0 | 0.084975 | 0.074131 | 0.001962 | 0        | 0        | 0 | 0 | 0 |
| 0 | 0.042791 | 0.062194 | 0.001532 | 0        | 0        | 0 | 0 | 0 |
| 0 | 0.048083 | 0.073009 | 0.000715 | 0        | 0        | 0 | 0 | 0 |
| 0 | 0.093563 | 0.067324 | 0.002374 | 0        | 0        | 0 | 0 | 0 |
| 0 | 0.013694 | 0.053164 | 0.001754 | 0        | 0        | 0 | 0 | 0 |
| 0 | 0        | 0.032169 | 0        | 0        | 0        | 0 | 0 | 0 |
| 0 | 0        | 0.031176 | 0        | 0        | 0        | 0 | 0 | 0 |
| 0 | 0        | 0.030118 | 0        | 0        | 0        | 0 | 0 | 0 |
| 0 | 0        | 0.031056 | 0        | 0        | 0        | 0 | 0 | 0 |
| 0 | 0        | 0.032118 | 0        | 0        | 0        | 0 | 0 | 0 |
| 0 | 0        | 0.034181 | 0        | 0        | 0        | 0 | 0 | 0 |
| 0 | 0        | 0.034005 | 0        | 0        | 0        | 0 | 0 | 0 |
| 0 | 0        | 0.036917 | 0        | 0        | 0        | 0 | 0 | 0 |
| 0 | 0        | 0.03684  | 0        | 0        | 0        | 0 | 0 | 0 |
| 0 | 0        | 0.028571 | 0        | 0        | 0        | 0 | 0 | 0 |

| 18       | 19       | 20 | 21       | 22 | 23       | 24       | 25 | 26       |
|----------|----------|----|----------|----|----------|----------|----|----------|
| 0.029561 | 0        | 0  | 0.181189 | 0  | 0        | 0        | 0  | 0        |
| 0.029824 | 0        | 0  | 0.171526 | 0  | 0        | 0        | 0  | 0        |
| 0.021674 | 0        | 0  | 0.000001 | 0  | 0        | 0        | 0  | 0        |
| 0.021007 | 0        | 0  | 0.221648 | 0  | 0        | 0        | 0  | 0        |
| 0.024176 | 0        | 0  | 0.191594 | 0  | 0        | 0        | 0  | 0        |
| 0.029978 | 0        | 0  | 0.146886 | 0  | 0        | 0        | 0  | 0        |
| 0.020172 | 0        | 0  | 0.139558 | 0  | 0        | 0        | 0  | 0        |
| 0.024148 | 0        | 0  | 0.000001 | 0  | 0        | 0        | 0  | 0        |
| 0.026415 | 0        | 0  | 0.157967 | 0  | 0        | 0        | 0  | 0        |
| 0.028583 | 0        | 0  | 0.155989 | 0  | 0        | 0        | 0  | 0        |
| 0.031663 | 0        | 0  | 0.150644 | 0  | 0        | 0        | 0  | 0        |
| 0.029884 | 0        | 0  | 0.159738 | 0  | 0        | 0        | 0  | 0        |
| 0.024071 | 0        | 0  | 0.14212  | 0  | 0        | 0        | 0  | 0        |
| 0.024374 | 0        | 0  | 0.014824 | 0  | 0        | 0        | 0  | 0        |
| 0.02835  | 0        | 0  | 0.15165  | 0  | 0        | 0        | 0  | 0        |
| 0        | 0        | 0  | 0.158403 | 0  | 0        | 0        | 0  | 0        |
| 0.02176  | 0        | 0  | 0.141024 | 0  | 0        | 0        | 0  | 0        |
| 0        | 0        | 0  | 0.034839 | 0  | 0        | 0.095446 | 0  | 0.106254 |
| 0        | 0        | 0  | 0.017299 | 0  | 0        | 0.066563 | 0  | 0.053201 |
| 0        | 0        | 0  | 0.027166 | 0  | 0        | 0.079619 | 0  | 0.082592 |
| 0        | 0        | 0  | 0.013259 | 0  | 0        | 0.060409 | 0  | 0.084901 |
| 0        | 0        | 0  | 0.028446 | 0  | 0        | 0.173506 | 0  | 0.069592 |
| 0        | 0        | 0  | 0.027741 | 0  | 0        | 0.040423 | 0  | 0.080298 |
| 0        | 0        | 0  | 0.026741 | 0  | 0        | 0.060423 | 0  | 0.070331 |
| 0        | 0        | 0  | 0.025    | 0  | 0.004394 | 0        | 0  | 0.062512 |
| 0        | 0        | 0  | 0.024777 | 0  | 0.003945 | 0        | 0  | 0.0731   |
| 0        | 0        | 0  | 0.024488 | 0  | 0.006025 | 0        | 0  | 0.059341 |
| 0        | 0        | 0  | 0.000001 | 0  | 0.003177 | 0        | 0  | 0.086413 |
| 0        | 0        | 0  | 0.033526 | 0  | 0.002643 | 0        | 0  | 0.08901  |
| 0        | 0        | 0  | 0.030595 | 0  | 0.010267 | 0        | 0  | 0.072102 |
| 0        | 0        | 0  | 0.021939 | 0  | 0.00456  | 0        | 0  | 0.042709 |
| 0        | 0        | 0  | 0.036983 | 0  | 0.007581 | 0        | 0  | 0.06076  |
| 0        | 0        | 0  | 0.034822 | 0  | 0.008611 | 0        | 0  | 0.064936 |
| 0        | 0        | 0  | 0.000001 | 0  | 0.008314 | 0        | 0  | 0.07285  |
| 0        | 0        | 0  | 0.03279  | 0  | 0.004785 | 0        | 0  | 0.052361 |
| 0        | 0        | 0  | 0.033669 | 0  | 0.006535 | 0        | 0  | 0.071068 |
| 0        | 0        | 0  | 0.034022 | 0  | 0.005121 | 0        | 0  | 0.058513 |
| 0        | 0        | 0  | 0.000001 | 0  | 0.004923 | 0        | 0  | 0.071131 |
| 0        | 0.018875 | 0  | 0.018648 | 0  | 0        | 0        | 0  | 0.057014 |
| 0        | 0.01569  | 0  | 0.019465 | 0  | 0.004369 | 0        | 0  | 0.056287 |
| 0        | 0        | 0  | 0.018857 | 0  | 0.002615 | 0        | 0  | 0.057018 |
| 0        | 0.013666 | 0  | 0.01677  | 0  | 0.002639 | 0        | 0  | 0.05616  |
| 0        | 0.018281 | 0  | 0.018323 | 0  | 0.002587 | 0        | 0  | 0.047912 |
| 0        | 0.01229  | 0  | 0.000001 | 0  | 0.004138 | 0        | 0  | 0.078621 |
| 0        | 0.01808  | 0  | 0.02376  | 0  | 0.006739 | 0        | 0  | 0.10213  |
| 0        | 0.014619 | 0  | 0.030058 | 0  | 0.002493 | 0        | 0  | 0.12734  |
| 0        | 0        | 0  | 0.027717 | 0  | 0.002832 | 0        | 0  | 0.07028  |
| 0        | 0.014209 | 0  | 0.023563 | 0  | 0.003099 | 0        | 0  | 0.058936 |
| 0        | 0.021229 | 0  | 0.029814 | 0  | 0        | 0        | 0  | 0.057162 |

|            |                     |                     |            |                     |            |
|------------|---------------------|---------------------|------------|---------------------|------------|
| 0          | 0                   | 0 0.025242          | 0 0.004874 | 0                   | 0 0.051476 |
| 0 0.017003 | 0 0.023861          | 0 0.004151          | 0          | 0 0.0441            |            |
| 0 0.01974  | 0 0.021995          | 0 0.004265          | 0          | 0 0.037931          |            |
| 0 0.005166 | 0 0.01068           | 0 0.002251          | 0          | 0 0.031069          |            |
| 0 0.006508 | 0 0.007495          | 0 0.002162          | 0          | 0 0.034163          |            |
| 0 0.004116 | 0 0.008526          | 0 0.003327          | 0          | 0 0.028412          |            |
| 0 0.006137 | 0 0.011505          | 0 0.002158          | 0          | 0                   | 0          |
| 0 0.00757  | 0 0.008301          | 0 0.003681          | 0          | 0 0.029426          |            |
| 0          | 0                   | 0 0.054081 0.068287 | 0          | 0 0.021935 0.053997 |            |
| 0          | 0                   | 0 0.051177 0.068287 | 0          | 0 0.030085 0.05319  |            |
| 0          | 0                   | 0 0.061854 0.051821 | 0          | 0 0.017324 0.053471 |            |
| 0          | 0                   | 0 0.030064 0.067238 | 0          | 0 0.02516 0.066028  |            |
| 0          | 0                   | 0 0.030784 0.070338 | 0          | 0 0.023301 0.08927  |            |
| 0          | 0                   | 0 0.059659 0.064196 | 0          | 0 0.019936 0.052713 |            |
| 0          | 0                   | 0 0.040758 0.054422 | 0          | 0 0.02948 0.051506  |            |
| 0          | 0                   | 0 0.061854 0.062182 | 0          | 0 0.0365 0.053529   |            |
| 0          | 0 0.021052 0.078111 | 0                   | 0 0.013884 | 0 0.135923          |            |
| 0          | 0 0.016623 0.075478 | 0                   | 0 0.012323 | 0 0.083126          |            |
| 0          | 0 0.01643 0.051317  | 0                   | 0 0.012871 | 0 0.069104          |            |
| 0          | 0 0.013879 0.102211 | 0                   | 0 0.014375 | 0 0.098747          |            |
| 0          | 0 0.012206 0.039771 | 0                   | 0 0.025435 | 0 0.058269          |            |
| 0          | 0 0.01087 0.02516   | 0                   | 0 0.017587 | 0 0.043014          |            |
| 0          | 0 0.023078 0.031697 | 0                   | 0 0.015724 | 0 0.049317          |            |
| 0          | 0 0.013041 0.025099 | 0                   | 0 0.014212 | 0 0.043527          |            |
| 0          | 0 0.013041 0.038402 | 0                   | 0 0.020981 | 0 0.054926          |            |
| 0          | 0 0.013879 0.053068 | 0                   | 0 0.053013 | 0 0.065349          |            |
| 0          | 0 0.012206 0.038474 | 0                   | 0 0.029091 | 0 0.061841          |            |
| 0          | 0 0.01087 0.032906  | 0                   | 0 0.041327 | 0 0.020371          |            |
| 0          | 0 0.023078 0.057612 | 0                   | 0 0.10664  | 0 0.072796          |            |
| 0          | 0                   | 0 0.053977 0.05182  | 0          | 0 0.0135 0.058273   |            |
| 0          | 0                   | 0 0.062516 0.063435 | 0          | 0 0.03409 0.043183  |            |
| 0          | 0                   | 0 0.04317 0.07395   | 0          | 0 0.023701 0.050254 |            |
| 0          | 0                   | 0 0.060129 0.05599  | 0          | 0 0.02198 0.044317  |            |
| 0          | 0                   | 0 0.048472 0.06112  | 0          | 0 0.031085 0.054982 |            |
| 0          | 0                   | 0 0.0233 0.01537    | 0          | 0 0.06925 0.01611   |            |
| 0          | 0                   | 0 0.02425 0.01717   | 0          | 0 0.098053          | 0          |
| 0          | 0                   | 0 0.031373 0.01105  | 0          | 0 0.053702 0.017308 |            |
| 0          | 0                   | 0 0.034015 0.02094  | 0          | 0 0.07603 0.013028  |            |
| 0          | 0                   | 0 0.03201 0.01834   | 0          | 0 0.05137 0.013151  |            |
| 0          | 0                   | 0 0.031016 0.0148   | 0          | 0 0.07028 0.01982   |            |
| 0          | 0                   | 0 0.030983 0.007958 | 0          | 0 0.05844 0.01084   |            |
| 0          | 0                   | 0 0.029302 0.023019 | 0          | 0 0.063584          | 0          |
| 0          | 0                   | 0 0.031583          | 0          | 0 0.0948            | 0          |
| 0          | 0                   | 0 0.032143 0.015    | 0          | 0 0.065             | 0          |

| 27       | 28       | 29       | 30       | 31       | 32       | 33       | 34       | 35       |
|----------|----------|----------|----------|----------|----------|----------|----------|----------|
| 0.001305 | 0        | 0.047204 | 0        | 0        | 0        | 0        | 0        | 0        |
| 0.004167 | 0        | 0.052156 | 0        | 0        | 0        | 0        | 0        | 0        |
| 0.003479 | 0        | 0.044419 | 0        | 0        | 0        | 0        | 0        | 0        |
| 0.001352 | 0        | 0.041245 | 0        | 0        | 0        | 0        | 0        | 0        |
| 0.001522 | 0        | 0        | 0        | 0        | 0        | 0        | 0        | 0        |
| 0.010024 | 0        | 0.041979 | 0        | 0        | 0        | 0        | 0        | 0        |
| 0.003396 | 0        | 0.035017 | 0        | 0        | 0        | 0        | 0        | 0        |
| 0.008818 | 0        | 0.056523 | 0        | 0        | 0        | 0        | 0        | 0        |
| 0.006289 | 0        | 0.044121 | 0        | 0        | 0        | 0        | 0        | 0        |
| 0.009653 | 0        | 0.06956  | 0        | 0        | 0        | 0        | 0        | 0        |
| 0.007462 | 0        | 0.063598 | 0        | 0        | 0        | 0        | 0        | 0        |
| 0.003429 | 0        | 0        | 0        | 0        | 0        | 0        | 0        | 0        |
| 0.008808 | 0        | 0.083013 | 0        | 0        | 0        | 0        | 0        | 0        |
| 0.003296 | 0        | 0.068273 | 0        | 0        | 0        | 0        | 0        | 0        |
| 0.002251 | 0        | 0.044929 | 0        | 0        | 0        | 0        | 0        | 0        |
| 0.00469  | 0        | 0.050053 | 0        | 0        | 0        | 0        | 0        | 0        |
| 0.000001 | 0        | 0.075506 | 0        | 0        | 0        | 0        | 0        | 0        |
| 0.015741 | 0        | 0.350891 | 0.021628 | 0        | 0.106263 | 0        | 0.019341 | 0.106208 |
| 0.014729 | 0        | 0.348591 | 0.014176 | 0        | 0.053155 | 0        | 0.007985 | 0.052987 |
| 0.017742 | 0        | 0.411076 | 0.018132 | 0        | 0.082637 | 0        | 0.029546 | 0.082492 |
| 0.018728 | 0        | 0.213627 | 0.018545 | 0        | 0.084896 | 0        | 0.024207 | 0.085024 |
| 0.018743 | 0        | 0.231024 | 0.018541 | 0        | 0.069654 | 0        | 0.051005 | 0.070154 |
| 0.015569 | 0        | 0.400626 | 0.016732 | 0        | 0.080329 | 0        | 0.050312 | 0.079862 |
| 0.016569 | 0        | 0.470626 | 0.016732 | 0        | 0.070329 | 0        | 0.040312 | 0.070385 |
| 0.041493 | 0.034858 | 0.457987 | 0.03019  | 0.089206 | 0.06142  | 0        | 0.021955 | 0.062172 |
| 0.000001 | 0.031242 | 0.423714 | 0.040459 | 0.088763 | 0.072503 | 0        | 0.033098 | 0.071974 |
| 0.026621 | 0.02948  | 0.399162 | 0.035818 | 0.079336 | 0.058529 | 0        | 0.031064 | 0.05863  |
| 0.03113  | 0.032781 | 0.433174 | 0.040529 | 0.087813 | 0.086594 | 0        | 0.050478 | 0.085793 |
| 0.027505 | 0.034741 | 0.468874 | 0.045294 | 0        | 0.079112 | 0        | 0.048243 | 0.080124 |
| 0.031386 | 0.033853 | 0.479665 | 0.083503 | 0.101833 | 0.071741 | 0        | 0.026251 | 0.071468 |
| 0.037714 | 0.022906 | 0.372834 | 0        | 0.105995 | 0.041653 | 0        | 0.032243 | 0.040979 |
| 0.042642 | 0.03567  | 0.425548 | 0.077324 | 0.100326 | 0        | 0        | 0.026209 | 0.06076  |
| 0.048625 | 0.03952  | 0.533515 | 0.070245 | 0.103618 | 0.065802 | 0        | 0.057416 | 0.066031 |
| 0.043421 | 0.038116 | 0.519765 | 0.054497 | 0.106416 | 0.075494 | 0        | 0.021237 | 0.059725 |
| 0.039568 | 0.028083 | 0.456444 | 0.071159 | 0.079547 | 0.0517   | 0        | 0.0487   | 0.060395 |
| 0.000001 | 0.052337 | 0        | 0.076966 | 0.080304 | 0.070659 | 0        | 0.032504 | 0        |
| 0.039584 | 0.040463 | 0.462441 | 0.064747 | 0.091636 | 0.059457 | 0        | 0.032689 | 0.061273 |
| 0.04005  | 0.00474  | 0.446413 | 0.055821 | 0.069546 | 0.071016 | 0        | 0.0489   | 0.069042 |
| 0.017153 | 0.022919 | 0.343247 | 0.012781 | 0.089206 | 0.056878 | 0.019565 | 0.032133 | 0.057033 |
| 0.012647 | 0.018185 | 0.302401 | 0.009182 | 0.088763 | 0.056292 | 0.019598 | 0.027795 | 0.055567 |
| 0.01225  | 0.017498 | 0.295631 | 0.00867  | 0.079336 | 0.056997 | 0.019731 | 0.028718 | 0.056397 |
| 0.011199 | 0.016154 | 0.282091 | 0.010787 | 0        | 0.048448 | 0.016969 | 0        | 0.048649 |
| 0.015333 | 0.02344  | 0.3543   | 0.013362 | 0.092885 | 0.048882 | 0.018278 | 0.026966 | 0.048087 |
| 0.012649 | 0.008458 | 0.362429 | 0.008259 | 0.101833 | 0        | 0.016308 | 0.026436 | 0.076128 |
| 0.021003 | 0        | 0.427862 | 0.013758 | 0.153618 | 0.10205  | 0.015986 | 0.045966 | 0.110413 |
| 0.02809  | 0.020557 | 0.379197 | 0.014775 | 0.136416 | 0.128628 | 0.012012 | 0.045817 | 0.12793  |
| 0.01412  | 0.01523  | 0.3143   | 0.007204 | 0.079547 | 0.06979  | 0.013507 | 0.018634 | 0.078396 |
| 0.013483 | 0.015426 | 0.272958 | 0.011018 | 0.100304 | 0.059021 | 0        | 0.025066 | 0.05894  |
| 0.012908 | 0.018832 | 0.327475 | 0.018287 | 0.151636 | 0.057049 | 0.012593 | 0.026793 | 0.056946 |

|          |          |          |          |          |          |          |          |          |
|----------|----------|----------|----------|----------|----------|----------|----------|----------|
| 0.012043 | 0.019292 | 0.347537 | 0.028452 | 0.054546 | 0.052015 | 0.010481 | 0.015696 | 0.051923 |
| 0.010824 | 0.020285 | 0        | 0.028631 | 0.087813 | 0.043995 | 0.006465 | 0.015119 | 0.044101 |
| 0.016678 | 0.025369 | 0.395706 | 0.017871 | 0        | 0.038769 | 0.004841 | 0.012779 | 0        |
| 0.000001 | 0.00462  | 0.134533 | 0.029712 | 0.131833 | 0.032891 | 0.009473 | 0.175844 | 0.033153 |
| 0.016723 | 0.004783 | 0.108315 | 0.038491 | 0.135995 | 0.035474 | 0.007772 | 0        | 0.032874 |
| 0.013772 | 0.018559 | 0.115252 | 0.018557 | 0.140326 | 0.02835  | 0.006206 | 0.016093 | 0.028471 |
| 0.016171 | 0.00282  | 0.104072 | 0.032105 | 0.153618 | 0.034472 | 0.009556 | 0.020972 | 0.035109 |
| 0.017095 | 0.034786 | 0.109313 | 0.043087 | 0.136416 | 0.029538 | 0.00741  | 0.016708 | 0.028926 |
| 0.046573 | 0        | 0.440684 | 0.049295 | 0        | 0.054013 | 0        | 0.056053 | 0.05412  |
| 0.047141 | 0        | 0.531045 | 0.051513 | 0        | 0.053243 | 0        | 0.05306  | 0.052992 |
| 0.061243 | 0        | 0.556447 | 0.063867 | 0        | 0.053555 | 0        | 0.078344 | 0.053498 |
| 0.039848 | 0        | 0.404748 | 0.040343 | 0        | 0.065769 | 0        | 0.067891 | 0.066031 |
| 0.074974 | 0        | 0.528534 | 0.052984 | 0        | 0.089393 | 0        | 0.062882 | 0.089026 |
| 0.06312  | 0        | 0.471561 | 0.050862 | 0        | 0.052695 | 0        | 0.073349 | 0.052479 |
| 0.048458 | 0        | 0.430004 | 0.055031 | 0        | 0.051451 | 0        | 0.064084 | 0.051413 |
| 0.061243 | 0        | 0.656447 | 0.063867 | 0        | 0.053555 | 0        | 0.078344 | 0.053496 |
| 0.026526 | 0        | 0.333599 | 0.017369 | 0        | 0.136799 | 0        | 0.048794 | 0.13781  |
| 0.024336 | 0        | 0.208087 | 0.031173 | 0        | 0.083145 | 0        | 0.021652 | 0.082974 |
| 0.01875  | 0        | 0.170626 | 0.015128 | 0        | 0.069017 | 0        | 0.011955 | 0.068945 |
| 0.02951  | 0        | 0.235285 | 0.045028 | 0        | 0.099336 | 0        | 0.036996 | 0.098732 |
| 0.016291 | 0        | 0.212339 | 0.022098 | 0        | 0.058312 | 0        | 0.015953 | 0.057926 |
| 0.011662 | 0        | 0.188232 | 0.01266  | 0        | 0.042984 | 0        | 0.013726 | 0.043068 |
| 0.008006 | 0        | 0.148028 | 0.011964 | 0        | 0.049277 | 0        | 0.009223 | 0.048952 |
| 0.013041 | 0        | 0.201338 | 0.012474 | 0        | 0.043631 | 0        | 0.015574 | 0.042859 |
| 0.013657 | 0        | 0.189305 | 0.020994 | 0        | 0.055222 | 0        | 0.015772 | 0.054908 |
| 0.020404 | 0        | 0.363123 | 0.018503 | 0        | 0.065534 | 0        | 0.015107 | 0.065426 |
| 0.018194 | 0        | 0.365102 | 0.016735 | 0        | 0.061758 | 0        | 0.016432 | 0.061582 |
| 0.009043 | 0        | 0.088703 | 0.016982 | 0        | 0.019905 | 0        | 0.007847 | 0.020173 |
| 0.034265 | 0        | 0.328389 | 0.03246  | 0        | 0.072801 | 0        | 0.025855 | 0.073104 |
| 0.046291 | 0        | 0.212339 | 0.022098 | 0        | 0.058312 | 0        | 0.015953 | 0.058192 |
| 0.051166 | 0        | 0.188232 | 0.01266  | 0        | 0.042984 | 0        | 0.013726 | 0.043078 |
| 0.048006 | 0        | 0.148028 | 0.011964 | 0        | 0.049277 | 0        | 0.009223 | 0.049252 |
| 0.061304 | 0        | 0.201338 | 0.012474 | 0        | 0.043631 | 0        | 0.015574 | 0.044069 |
| 0.057398 | 0        | 0.189305 | 0.020994 | 0        | 0.055222 | 0        | 0.015772 | 0.054973 |
| 0.013551 | 0        | 0        | 0        | 0        | 0.017942 | 0        | 0        | 0.015308 |
| 0.01347  | 0        | 0.411242 | 0        | 0        | 0.0143   | 0        | 0        | 0.01945  |
| 0.013604 | 0        | 0        | 0        | 0        | 0        | 0        | 0        | 0.01753  |
| 0.015444 | 0        | 0.421904 | 0        | 0        | 0.021239 | 0        | 0        | 0.01283  |
| 0.01548  | 0        | 0.401904 | 0        | 0        | 0.018251 | 0        | 0        | 0.013281 |
| 0.015081 | 0        | 0.621904 | 0        | 0        | 0        | 0        | 0        | 0.021051 |
| 0.019608 | 0        | 0.631806 | 0        | 0        | 0.01905  | 0        | 0        | 0.01051  |
| 0.018995 | 0        | 0.505117 | 0        | 0        | 0.014571 | 0        | 0        | 0        |
| 0.01802  | 0        | 0.505117 | 0        | 0        | 0        | 0        | 0        | 0.01619  |
| 0.018286 | 0        | 0.542857 | 0        | 0        | 0.01284  | 0        | 0        | 0        |
